# Supplementary material for: Analysis of Phosphorylation of the Receptor-Like Protein Kinase HAESA during Arabidopsis Floral Abscission
Source: PLoS One. 2016 Jan 19;11(1):e0147203. doi: 10.1371/journal.pone.0147203 (PMC4718614; doi:10.1371/journal.pone.0147203)
Supplement: S1 Table — (XLSX) [file pone.0147203.s012.xlsx]

## Sheet: high confidence sites
Sequence	Site(s)	Prob	SEQUEST XCorr	SEQUEST deltaCn	NTT (trypsin cleavage sites)	Modifications	Observed m/z	Actual Mass (uncharged)	Charge-state	Delta AMU (Da)	Delta PPM	TIC (Signal intensity)		Enzyme
GST-HAE
(R)DVFAAEVEtLGtIR(H)	T740/T743	1	2.9853	0.314	2	Phospho (+80), Phospho (+80)	840.865	1679.71	2	-0.006297	-3.746	14828.3	HAESA_2uL_Phos_0706_4uL.1630.1630.2.dta	trypsin
(R)DVFAAEVEtLGtIR(H)	T740/T743	0.99	2.7971	0.1946	2	Phospho (+80), Phospho (+80)	840.865	1679.71	2	-0.006297	-3.746	11664.4	HAESA_2uL_Phos_0706_4uL.1648.1648.2.dta	trypsin
(K)tPEAmSGIAGScGYIAPEYVYTLR(V)	T851	1	4.2709	0.4453	2	Phospho (+80), Oxidation (+16), Carbamidomethyl (+57)	901.399	2701.18	3	-0.00404	-1.495	34084.4	HAESA_2uL_Phos_0706_4uL.1881.1881.3.dta	trypsin
(K)tPEAmSGIAGScGYIAPEYVYTLR(V)	T851	1	4.3233	0.4168	2	Phospho (+80), Oxidation (+16), Carbamidomethyl (+57)	901.399	2701.18	3	-0.00404	-1.495	25961.2	HAESA_2uL_Phos_0706_4uL.1839.1839.3.dta	trypsin
(K)TPEAMsGIAGScGYIAPEYVYtLR(V)	S856/T872	1	4.6358	0.0772	2	Phospho (+80), Carbamidomethyl (+57), Phospho (+80)	1383.58	2765.14	2	-0.01425	-5.15	11332	HAESA_2uL_Phos_0706_4uL.2053.2053.2.dta	trypsin
(K)VGQMSGSKtPEAMSGIAGScGYIAPEYVYTLR(V)	T851	1	4.8833	0.2582	2	Phospho (+80), Carbamidomethyl (+57)	1154.53	3460.57	3	1.012	2.648 (+1 neutron corrected from 292.3)	14560.6	HAESA_2uL_Phos_0706_4uL.1907.1907.3.dta	trypsin
(K)TPEAMsGIAGScGYIAPEYVYTLR(V)	S856	1	5.8294	0.5775	2	Phospho (+80), Carbamidomethyl (+57)	1343.59	2685.17	2	-0.0142	-5.287	22302.3	HAESA_2uL_Phos_0706_4uL.2183.2183.2.dta	trypsin
(K)TPEAMsGIAGScGYIAPEYVYTLR(V)	S856	1	4.9396	0.5871	2	Phospho (+80), Carbamidomethyl (+57)	1343.59	2685.17	2	-0.0142	-5.287	36587.7	HAESA_2uL_Phos_0706_4uL.2101.2101.2.dta	trypsin
(K)TPEAMsGIAGScGYIAPEYVYTLR(V)	S856	1	4.3233	0.4987	2	Phospho (+80), Carbamidomethyl (+57)	896.07	2685.19	3	0.003695	1.376	34390	HAESA_2uL_Phos_0706_4uL.2142.2142.3.dta	trypsin
(K)TPEAMsGIAGScGYIAPEYVYTLR(V)	S856	1	4.8327	0.5772	2	Phospho (+80), Carbamidomethyl (+57)	1343.59	2685.17	2	-0.0142	-5.287	49675.6	HAESA_2uL_Phos_0706_4uL.2121.2121.2.dta	trypsin
(K)TPEAMsGIAGScGYIAPEYVYTLR(V)	S856	1	5.1157	0.5554	2	Phospho (+80), Carbamidomethyl (+57)	1343.59	2685.17	2	-0.0142	-5.287	22076.1	HAESA_2uL_Phos_0706_4uL.2084.2084.2.dta	trypsin
(K)TPEAMsGIAGScGYIAPEYVYTLR(V)	S856	1	4.3977	0.4737	2	Phospho (+80), Carbamidomethyl (+57)	896.07	2685.19	3	0.003695	1.376	19598.1	HAESA_2uL_Phos_0706_4uL.2085.2085.3.dta	trypsin
(K)TPEAMsGIAGScGYIAPEYVYTLR(V)	S856	1	4.437	0.5821	2	Phospho (+80), Carbamidomethyl (+57)	1343.59	2685.17	2	-0.0142	-5.287	35916.3	HAESA_2uL_Phos_0706_4uL.2161.2161.2.dta	trypsin
(K)TPEAMsGIAGScGYIAPEYVYTLR(V)	S856	1	4.7623	0.5419	2	Phospho (+80), Carbamidomethyl (+57)	1343.59	2685.17	2	-0.0142	-5.287	15269	HAESA_2uL_Phos_0706_4uL.2222.2222.2.dta	trypsin
(K)TPEAMsGIAGScGYIAPEYVYTLR(V)	S856	1	4.7171	0.5407	2	Phospho (+80), Carbamidomethyl (+57)	1343.59	2685.17	2	-0.0142	-5.287	15518.7	HAESA_2uL_Phos_0706_4uL.2203.2203.2.dta	trypsin
(K)TPEAMsGIAGScGYIAPEYVYTLR(V)	S856	1	4.2112	0.5082	2	Phospho (+80), Carbamidomethyl (+57)	1343.59	2685.17	2	-0.0142	-5.287	13164	HAESA_2uL_Phos_0706_4uL.2243.2243.2.dta	trypsin
(K)TPEAMsGIAGScGYIAPEYVYTLR(V)	S856	1	4.4551	0.4648	2	Phospho (+80), Carbamidomethyl (+57)	1343.59	2685.17	2	-0.0142	-5.287	9262.91	HAESA_2uL_Phos_0706_4uL.2283.2283.2.dta	trypsin
(K)TPEAMsGIAGScGYIAPEYVYTLR(V)	S856	1	4.665	0.4384	2	Phospho (+80), Carbamidomethyl (+57)	1343.59	2685.17	2	-0.0142	-5.287	11249.2	HAESA_2uL_Phos_0706_4uL.2263.2263.2.dta	trypsin
(K)TPEAMsGIAGScGYIAPEYVYTLR(V)	S856	1	4.1461	0.4013	2	Phospho (+80), Carbamidomethyl (+57)	896.07	2685.19	3	0.003695	1.376	30485.5	HAESA_2uL_Phos_0706_4uL.2122.2122.3.dta	trypsin
(K)TPEAMsGIAGScGYIAPEYVYTLR(V)	S856	1	3.9388	0.4639	2	Phospho (+80), Carbamidomethyl (+57)	1343.59	2685.17	2	-0.0142	-5.287	7003.23	HAESA_2uL_Phos_0706_4uL.2333.2333.2.dta	trypsin
(K)TPEAMsGIAGScGYIAPEYVYTLR(V)	S856	1	3.9388	0.3916	2	Phospho (+80), Carbamidomethyl (+57)	896.07	2685.19	3	0.003695	1.376	28749.1	HAESA_2uL_Phos_0706_4uL.2163.2163.3.dta	trypsin
(K)TPEAMsGIAGScGYIAPEYVYTLR(V)	S856	1	4.0811	0.365	2	Phospho (+80), Carbamidomethyl (+57)	896.07	2685.19	3	0.003695	1.376	29458.4	HAESA_2uL_Phos_0706_4uL.2102.2102.3.dta	trypsin
(K)TPEAMsGIAGScGYIAPEYVYTLR(V)	S856	1	4.45	0.3468	2	Phospho (+80), Carbamidomethyl (+57)	896.07	2685.19	3	0.003695	1.376	20084.7	HAESA_2uL_Phos_0706_4uL.2185.2185.3.dta	trypsin
(K)TPEAMsGIAGScGYIAPEYVYTLR(V)	S856	1	4.3089	0.4386	2	Phospho (+80), Carbamidomethyl (+57)	1344.09	2686.17	2	0.9829	-7.361 (+1 neutron corrected from 365.8)	7268.44	HAESA_2uL_Phos_0706_4uL.2328.2328.2.dta	trypsin
(K)TPEAMsGIAGScGYIAPEYVYTLR(V)	S856	1	3.8372	0.3081	2	Phospho (+80), Carbamidomethyl (+57)	896.07	2685.19	3	0.003695	1.376	13026.1	HAESA_2uL_Phos_0706_4uL.2205.2205.3.dta	trypsin
(K)TPEAMsGIAGScGYIAPEYVYTLR(V)	S856	1	3.7481	0.299	2	Phospho (+80), Carbamidomethyl (+57)	896.07	2685.19	3	0.003695	1.376	16139.7	HAESA_2uL_Phos_0706_4uL.2227.2227.3.dta	trypsin
(K)TPEAMsGIAGScGYIAPEYVYTLR(V)	S856	1	3.8349	0.378	2	Phospho (+80), Carbamidomethyl (+57)	1343.59	2685.17	2	-0.0142	-5.287	7079.51	HAESA_2uL_Phos_0706_4uL.2303.2303.2.dta	trypsin
(K)TPEAMsGIAGScGYIAPEYVYTLR(V)	S856	1	3.5196	0.3893	2	Phospho (+80), Carbamidomethyl (+57)	1344.09	2686.17	2	0.9829	-7.361 (+1 neutron corrected from 365.8)	7413.04	HAESA_2uL_Phos_0706_4uL.2406.2406.2.dta	trypsin
(K)TPEAMsGIAGScGYIAPEYVYTLR(V)	S856	1	5.2939	0.1888	2	Phospho (+80), Carbamidomethyl (+57)	1343.59	2685.17	2	-0.0142	-5.287	29226.7	HAESA_2uL_Phos_0706_4uL.2141.2141.2.dta	trypsin
(K)TPEAMsGIAGScGYIAPEYVYTLR(V)	S856	1	3.2633	0.3334	2	Phospho (+80), Carbamidomethyl (+57)	896.07	2685.19	3	0.003695	1.376	11536.9	HAESA_2uL_Phos_0706_4uL.2298.2298.3.dta	trypsin
(K)TPEAMsGIAGScGYIAPEYVYTLR(V)	S856	1	4.1454	0.148	2	Phospho (+80), Carbamidomethyl (+57)	1344.09	2686.17	2	0.9829	-7.361 (+1 neutron corrected from 365.8)	7951.44	HAESA_2uL_Phos_0706_4uL.2342.2342.2.dta	trypsin
(K)GGDDEYSSDSLNRDVFAAEVETLGtIR(H)	T743	1	4.9644	0.4171	2	Phospho (+80)	999.446	2995.32	3	0.006607	2.205	14451.1	HAESA_2uL_Phos_0706_4uL.1993.1993.3.dta	trypsin
(R)DVFAAEVETLGtIR(H)	T743	1	4.2274	0.5184	2	Phospho (+80)	800.879	1599.74	2	-0.01177	-7.352	18473.7	HAESA_2uL_Phos_0706_4uL.1933.1933.2.dta	trypsin
(R)DVFAAEVETLGtIR(H)	T743	1	4.0865	0.5235	2	Phospho (+80)	800.879	1599.74	2	-0.01177	-7.352	13719.4	HAESA_2uL_Phos_0706_4uL.1913.1913.2.dta	trypsin
(R)DVFAAEVETLGtIR(H)	T743	1	4.3742	0.4827	2	Phospho (+80)	800.879	1599.74	2	-0.01177	-7.352	11949.8	HAESA_2uL_Phos_0706_4uL.1893.1893.2.dta	trypsin
(R)DVFAAEVETLGtIR(H)	T743	1	3.9206	0.5179	2	Phospho (+80)	800.879	1599.74	2	-0.01177	-7.352	43706	HAESA_2uL_Phos_0706_4uL.1823.1823.2.dta	trypsin
(R)DVFAAEVETLGtIR(H)	T743	1	4.495	0.467	2	Phospho (+80)	800.879	1599.74	2	-0.01177	-7.352	13608.6	HAESA_2uL_Phos_0706_4uL.1803.1803.2.dta	trypsin
(R)DVFAAEVETLGtIR(H)	T743	1	4.2242	0.481	2	Phospho (+80)	800.879	1599.74	2	-0.01177	-7.352	30811.1	HAESA_2uL_Phos_0706_4uL.1843.1843.2.dta	trypsin
(R)DVFAAEVETLGtIR(H)	T743	1	4.1488	0.486	2	Phospho (+80)	800.879	1599.74	2	-0.01177	-7.352	18995.8	HAESA_2uL_Phos_0706_4uL.1952.1952.2.dta	trypsin
(R)DVFAAEVETLGtIR(H)	T743	1	4.0372	0.4944	2	Phospho (+80)	800.879	1599.74	2	-0.01177	-7.352	11908.3	HAESA_2uL_Phos_0706_4uL.3965.3965.2.dta	trypsin
(R)DVFAAEVETLGtIR(H)	T743	1	4.3459	0.4675	2	Phospho (+80)	800.879	1599.74	2	-0.01177	-7.352	19545.7	HAESA_2uL_Phos_0706_4uL.1972.1972.2.dta	trypsin
(R)DVFAAEVETLGtIR(H)	T743	1	4.0729	0.4874	2	Phospho (+80)	800.879	1599.74	2	-0.01177	-7.352	15364.4	HAESA_2uL_Phos_0706_4uL.1868.1868.2.dta	trypsin
(R)DVFAAEVETLGtIR(H)	T743	1	3.7668	0.5056	2	Phospho (+80)	800.879	1599.74	2	-0.01177	-7.352	10283.1	HAESA_2uL_Phos_0706_4uL.2132.2132.2.dta	trypsin
(R)DVFAAEVETLGtIR(H)	T743	1	3.6721	0.4979	2	Phospho (+80)	800.879	1599.74	2	-0.01177	-7.352	7036.02	HAESA_2uL_Phos_0706_4uL.3230.3230.2.dta	trypsin
(R)DVFAAEVETLGtIR(H)	T743	1	3.6724	0.4629	2	Phospho (+80)	800.879	1599.74	2	-0.01177	-7.352	8583.82	HAESA_2uL_Phos_0706_4uL.3075.3075.2.dta	trypsin
(R)DVFAAEVETLGtIR(H)	T743	1	3.6272	0.4574	2	Phospho (+80)	800.879	1599.74	2	-0.01177	-7.352	6183.61	HAESA_2uL_Phos_0706_4uL.3541.3541.2.dta	trypsin
(R)DVFAAEVETLGtIR(H)	T743	1	3.8538	0.4316	2	Phospho (+80)	800.879	1599.74	2	-0.01177	-7.352	9639.48	HAESA_2uL_Phos_0706_4uL.3996.3996.2.dta	trypsin
(R)DVFAAEVETLGtIR(H)	T743	1	3.8729	0.4251	2	Phospho (+80)	800.879	1599.74	2	-0.01177	-7.352	5488.44	HAESA_2uL_Phos_0706_4uL.3598.3598.2.dta	trypsin
(R)DVFAAEVETLGtIR(H)	T743	1	4.2625	0.391	2	Phospho (+80)	800.879	1599.74	2	-0.01177	-7.352	11665.9	HAESA_2uL_Phos_0706_4uL.2151.2151.2.dta	trypsin
(R)DVFAAEVETLGtIR(H)	T743	1	3.0629	0.5013	2	Phospho (+80)	800.879	1599.74	2	-0.01177	-7.352	5931.77	HAESA_2uL_Phos_0706_4uL.3442.3442.2.dta	trypsin
(R)DVFAAEVETLGtIR(H)	T743	1	3.6009	0.4455	2	Phospho (+80)	800.879	1599.74	2	-0.01177	-7.352	8665.73	HAESA_2uL_Phos_0706_4uL.3058.3058.2.dta	trypsin
(R)DVFAAEVEtLGTIR(H)	T740	1	3.2315	0.4807	2	Phospho (+80)	800.879	1599.74	2	-0.01177	-7.352	18307.5	HAESA_2uL_Phos_0706_4uL.1679.1679.2.dta	trypsin
(R)DVFAAEVETLGtIR(H)	T743	1	3.4499	0.4529	2	Phospho (+80)	800.879	1599.74	2	-0.01177	-7.352	8215.66	HAESA_2uL_Phos_0706_4uL.3297.3297.2.dta	trypsin
(R)DVFAAEVETLGtIR(H)	T743	1	3.1525	0.4767	2	Phospho (+80)	800.879	1599.74	2	-0.01177	-7.352	7541.04	HAESA_2uL_Phos_0706_4uL.3212.3212.2.dta	trypsin
(R)DVFAAEVETLGtIR(H)	T743	1	3.5455	0.4319	2	Phospho (+80)	800.879	1599.74	2	-0.01177	-7.352	5442.49	HAESA_2uL_Phos_0706_4uL.3564.3564.2.dta	trypsin
(R)DVFAAEVETLGtIR(H)	T743	1	3.9087	0.3982	2	Phospho (+80)	800.879	1599.74	2	-0.01177	-7.352	6066.1	HAESA_2uL_Phos_0706_4uL.3352.3352.2.dta	trypsin
(R)DVFAAEVETLGtIR(H)	T743	1	3.2851	0.4565	2	Phospho (+80)	800.879	1599.74	2	-0.01177	-7.352	5270.13	HAESA_2uL_Phos_0706_4uL.3712.3712.2.dta	trypsin
(R)DVFAAEVETLGtIR(H)	T743	1	3.6934	0.4152	2	Phospho (+80)	800.879	1599.74	2	-0.01177	-7.352	16000.6	HAESA_2uL_Phos_0706_4uL.2031.2031.2.dta	trypsin
(R)DVFAAEVETLGtIR(H)	T743	1	3.3658	0.4459	2	Phospho (+80)	800.879	1599.74	2	-0.01177	-7.352	16928	HAESA_2uL_Phos_0706_4uL.2051.2051.2.dta	trypsin
(R)DVFAAEVETLGtIR(H)	T743	1	3.7354	0.4012	2	Phospho (+80)	800.879	1599.74	2	-0.01177	-7.352	11033.1	HAESA_2uL_Phos_0706_4uL.3949.3949.2.dta	trypsin
(R)DVFAAEVETLGtIR(H)	T743	1	3.6045	0.4132	2	Phospho (+80)	800.879	1599.74	2	-0.01177	-7.352	7722.96	HAESA_2uL_Phos_0706_4uL.3934.3934.2.dta	trypsin
(R)DVFAAEVETLGtIR(H)	T743	1	3.1513	0.4569	2	Phospho (+80)	800.879	1599.74	2	-0.01177	-7.352	6493.77	HAESA_2uL_Phos_0706_4uL.3314.3314.2.dta	trypsin
(R)DVFAAEVETLGtIR(H)	T743	1	3.2812	0.4417	2	Phospho (+80)	800.879	1599.74	2	-0.01177	-7.352	5401.49	HAESA_2uL_Phos_0706_4uL.3728.3728.2.dta	trypsin
(R)DVFAAEVETLGtIR(H)	T743	1	3.0971	0.4602	2	Phospho (+80)	800.879	1599.74	2	-0.01177	-7.352	4394.41	HAESA_2uL_Phos_0706_4uL.3583.3583.2.dta	trypsin
(R)DVFAAEVETLGtIR(H)	T743	1	3.8718	0.3803	2	Phospho (+80)	800.879	1599.74	2	-0.01177	-7.352	10732.5	HAESA_2uL_Phos_0706_4uL.2251.2251.2.dta	trypsin
(R)DVFAAEVETLGtIR(H)	T743	1	3.5599	0.3959	2	Phospho (+80)	800.879	1599.74	2	-0.01177	-7.352	12280.2	HAESA_2uL_Phos_0706_4uL.2270.2270.2.dta	trypsin
(R)DVFAAEVETLGtIR(H)	T743	1	3.5877	0.3892	2	Phospho (+80)	800.879	1599.74	2	-0.01177	-7.352	14915.4	HAESA_2uL_Phos_0706_4uL.2091.2091.2.dta	trypsin
(R)DVFAAEVETLGtIR(H)	T743	1	3.5835	0.3873	2	Phospho (+80)	800.879	1599.74	2	-0.01177	-7.352	6392.51	HAESA_2uL_Phos_0706_4uL.3140.3140.2.dta	trypsin
(R)DVFAAEVETLGtIR(H)	T743	1	3.5338	0.3889	2	Phospho (+80)	800.879	1599.74	2	-0.01177	-7.352	12837.5	HAESA_2uL_Phos_0706_4uL.2211.2211.2.dta	trypsin
(R)DVFAAEVETLGtIR(H)	T743	1	3.2506	0.4168	2	Phospho (+80)	800.879	1599.74	2	-0.01177	-7.352	4542.62	HAESA_2uL_Phos_0706_4uL.3822.3822.2.dta	trypsin
(R)DVFAAEVETLGtIR(H)	T743	1	3.6496	0.3756	2	Phospho (+80)	800.879	1599.74	2	-0.01177	-7.352	8118.16	HAESA_2uL_Phos_0706_4uL.4007.4007.2.dta	trypsin
(R)DVFAAEVETLGtIR(H)	T743	1	3.324	0.3953	2	Phospho (+80)	800.879	1599.74	2	-0.01177	-7.352	6193.73	HAESA_2uL_Phos_0706_4uL.3662.3662.2.dta	trypsin
(R)DVFAAEVETLGtIR(H)	T743	1	3.4739	0.3762	2	Phospho (+80)	800.879	1599.74	2	-0.01177	-7.352	5711.44	HAESA_2uL_Phos_0706_4uL.3698.3698.2.dta	trypsin
(R)DVFAAEVETLGtIR(H)	T743	1	3.0755	0.4174	2	Phospho (+80)	800.879	1599.74	2	-0.01177	-7.352	8133.65	HAESA_2uL_Phos_0706_4uL.2741.2741.2.dta	trypsin
(R)DVFAAEVETLGtIR(H)	T743	1	3.2311	0.4024	2	Phospho (+80)	800.879	1599.74	2	-0.01177	-7.352	6951.78	HAESA_2uL_Phos_0706_4uL.3342.3342.2.dta	trypsin
(R)DVFAAEVETLGtIR(H)	T743	1	3.1443	0.4277	2	Phospho (+80)	800.879	1599.74	2	-0.01177	-7.352	8123.07	HAESA_2uL_Phos_0706_4uL.3481.3481.2.dta	trypsin
(R)DVFAAEVETLGtIR(H)	T743	1	3.4041	0.3821	2	Phospho (+80)	800.879	1599.74	2	-0.01177	-7.352	8126.9	HAESA_2uL_Phos_0706_4uL.2785.2785.2.dta	trypsin
(R)DVFAAEVEtLGTIR(H)	T740	1	3.4517	0.3762	2	Phospho (+80)	800.879	1599.74	2	-0.01177	-7.352	15593.1	HAESA_2uL_Phos_0706_4uL.1699.1699.2.dta	trypsin
(R)DVFAAEVETLGtIR(H)	T743	1	3.2108	0.3986	2	Phospho (+80)	800.879	1599.74	2	-0.01177	-7.352	7863.78	HAESA_2uL_Phos_0706_4uL.4015.4015.2.dta	trypsin
(R)DVFAAEVETLGtIR(H)	T743	1	3.1821	0.4004	2	Phospho (+80)	800.879	1599.74	2	-0.01177	-7.352	5057.62	HAESA_2uL_Phos_0706_4uL.3751.3751.2.dta	trypsin
(R)DVFAAEVETLGtIR(H)	T743	1	3.5399	0.3611	2	Phospho (+80)	800.879	1599.74	2	-0.01177	-7.352	17129	HAESA_2uL_Phos_0706_4uL.1991.1991.2.dta	trypsin
(R)DVFAAEVETLGtIR(H)	T743	1	3.1218	0.4187	2	Phospho (+80)	800.879	1599.74	2	-0.01177	-7.352	10253.2	HAESA_2uL_Phos_0706_4uL.2531.2531.2.dta	trypsin
(R)DVFAAEVETLGtIR(H)	T743	1	2.9519	0.4172	2	Phospho (+80)	800.879	1599.74	2	-0.01177	-7.352	10156.6	HAESA_2uL_Phos_0706_4uL.2689.2689.2.dta	trypsin
(R)DVFAAEVETLGtIR(H)	T743	1	2.8307	0.4159	2	Phospho (+80)	800.879	1599.74	2	-0.01177	-7.352	17883.8	HAESA_2uL_Phos_0706_4uL.2011.2011.2.dta	trypsin
(R)DVFAAEVETLGtIR(H)	T743	1	3.4325	0.3493	2	Phospho (+80)	800.879	1599.74	2	-0.01177	-7.352	8619.97	HAESA_2uL_Phos_0706_4uL.3251.3251.2.dta	trypsin
(R)DVFAAEVETLGtIR(H)	T743	1	3.0681	0.4047	2	Phospho (+80)	800.879	1599.74	2	-0.01177	-7.352	13567.4	HAESA_2uL_Phos_0706_4uL.1785.1785.2.dta	trypsin
(R)DVFAAEVETLGtIR(H)	T743	1	3.531	0.3387	2	Phospho (+80)	800.879	1599.74	2	-0.01177	-7.352	11175.1	HAESA_2uL_Phos_0706_4uL.2232.2232.2.dta	trypsin
(R)DVFAAEVETLGtIR(H)	T743	1	3.0735	0.3827	2	Phospho (+80)	800.879	1599.74	2	-0.01177	-7.352	7349.38	HAESA_2uL_Phos_0706_4uL.3674.3674.2.dta	trypsin
(R)DVFAAEVETLGtIR(H)	T743	1	3.1155	0.3698	2	Phospho (+80)	800.879	1599.74	2	-0.01177	-7.352	5129.44	HAESA_2uL_Phos_0706_4uL.3738.3738.2.dta	trypsin
(R)DVFAAEVETLGtIR(H)	T743	1	3.1426	0.3652	2	Phospho (+80)	800.879	1599.74	2	-0.01177	-7.352	7984.56	HAESA_2uL_Phos_0706_4uL.2802.2802.2.dta	trypsin
(R)DVFAAEVETLGtIR(H)	T743	1	3.2917	0.3426	2	Phospho (+80)	800.879	1599.74	2	-0.01177	-7.352	4892.47	HAESA_2uL_Phos_0706_4uL.4021.4021.2.dta	trypsin
(R)DVFAAEVETLGtIR(H)	T743	1	3.2759	0.3425	2	Phospho (+80)	800.879	1599.74	2	-0.01177	-7.352	9872.41	HAESA_2uL_Phos_0706_4uL.2414.2414.2.dta	trypsin
(R)DVFAAEVETLGtIR(H)	T743	1	3.2341	0.3463	2	Phospho (+80)	800.879	1599.74	2	-0.01177	-7.352	4443.73	HAESA_2uL_Phos_0706_4uL.3762.3762.2.dta	trypsin
(R)DVFAAEVETLGtIR(H)	T743	1	3.0944	0.361	2	Phospho (+80)	800.879	1599.74	2	-0.01177	-7.352	8679.52	HAESA_2uL_Phos_0706_4uL.3328.3328.2.dta	trypsin
(R)DVFAAEVETLGtIR(H)	T743	1	3.0564	0.3567	2	Phospho (+80)	800.879	1599.74	2	-0.01177	-7.352	6261.84	HAESA_2uL_Phos_0706_4uL.3181.3181.2.dta	trypsin
(R)DVFAAEVETLGtIR(H)	T743	1	3.2199	0.3517	2	Phospho (+80)	800.879	1599.74	2	-0.01177	-7.352	9021.4	HAESA_2uL_Phos_0706_4uL.3013.3013.2.dta	trypsin
(R)DVFAAEVETLGtIR(H)	T743	1	2.8972	0.3564	2	Phospho (+80)	800.879	1599.74	2	-0.01177	-7.352	6770.55	HAESA_2uL_Phos_0706_4uL.3266.3266.2.dta	trypsin
(R)DVFAAEVETLGtIR(H)	T743	1	3.2573	0.3164	2	Phospho (+80)	800.879	1599.74	2	-0.01177	-7.352	7279.17	HAESA_2uL_Phos_0706_4uL.3413.3413.2.dta	trypsin
(R)DVFAAEVETLGtIR(H)	T743	1	2.6922	0.3807	2	Phospho (+80)	800.879	1599.74	2	-0.01177	-7.352	6982.26	HAESA_2uL_Phos_0706_4uL.3687.3687.2.dta	trypsin
(R)DVFAAEVETLGtIR(H)	T743	1	3.0884	0.3332	2	Phospho (+80)	800.879	1599.74	2	-0.01177	-7.352	8864.81	HAESA_2uL_Phos_0706_4uL.2112.2112.2.dta	trypsin
(R)DVFAAEVETLGtIR(H)	T743	1	3.0918	0.3258	2	Phospho (+80)	800.879	1599.74	2	-0.01177	-7.352	18902.9	HAESA_2uL_Phos_0706_4uL.2071.2071.2.dta	trypsin
(R)DVFAAEVETLGtIR(H)	T743	1	2.8514	0.3532	2	Phospho (+80)	800.879	1599.74	2	-0.01177	-7.352	6136.31	HAESA_2uL_Phos_0706_4uL.3553.3553.2.dta	trypsin
(R)DVFAAEVETLGtIR(H)	T743	1	2.9983	0.3278	2	Phospho (+80)	800.879	1599.74	2	-0.01177	-7.352	4117.53	HAESA_2uL_Phos_0706_4uL.3789.3789.2.dta	trypsin
(R)DVFAAEVETLGtIR(H)	T743	1	3.3681	0.3001	2	Phospho (+80)	800.879	1599.74	2	-0.01177	-7.352	12440.3	HAESA_2uL_Phos_0706_4uL.2171.2171.2.dta	trypsin
(R)DVFAAEVETLGtIR(H)	T743	1	3.0835	0.3087	2	Phospho (+80)	800.879	1599.74	2	-0.01177	-7.352	6965.09	HAESA_2uL_Phos_0706_4uL.3492.3492.2.dta	trypsin
(R)DVFAAEVETLGtIR(H)	T743	1	2.8493	0.3328	2	Phospho (+80)	800.879	1599.74	2	-0.01177	-7.352	7003.75	HAESA_2uL_Phos_0706_4uL.3468.3468.2.dta	trypsin
(R)DVFAAEVETLGtIR(H)	T743	1	3.5116	0.2761	2	Phospho (+80)	800.879	1599.74	2	-0.01177	-7.352	5309.65	HAESA_2uL_Phos_0706_4uL.3573.3573.2.dta	trypsin
(R)DVFAAEVETLGtIR(H)	T743	1	2.7701	0.3322	2	Phospho (+80)	800.879	1599.74	2	-0.01177	-7.352	7122.14	HAESA_2uL_Phos_0706_4uL.2821.2821.2.dta	trypsin
(R)DVFAAEVETLGtIR(H)	T743	1	2.7804	0.3279	2	Phospho (+80)	800.879	1599.74	2	-0.01177	-7.352	6138.58	HAESA_2uL_Phos_0706_4uL.3516.3516.2.dta	trypsin
(R)DVFAAEVETLGtIR(H)	T743	1	2.8	0.3227	2	Phospho (+80)	800.879	1599.74	2	-0.01177	-7.352	7020.15	HAESA_2uL_Phos_0706_4uL.3159.3159.2.dta	trypsin
(R)DVFAAEVEtLGTIR(H)	T740	1	2.8998	0.3042	2	Phospho (+80)	800.879	1599.74	2	-0.01177	-7.352	7122.97	HAESA_2uL_Phos_0706_4uL.3384.3384.2.dta	trypsin
(R)DVFAAEVETLGtIR(H)	T743	1	2.5279	0.3504	2	Phospho (+80)	800.879	1599.74	2	-0.01177	-7.352	4811.4	HAESA_2uL_Phos_0706_4uL.3645.3645.2.dta	trypsin
(R)DVFAAEVETLGtIR(H)	T743	1	2.9916	0.2864	2	Phospho (+80)	800.879	1599.74	2	-0.01177	-7.352	6708.06	HAESA_2uL_Phos_0706_4uL.3284.3284.2.dta	trypsin
(R)DVFAAEVETLGtIR(H)	T743	1	3.1644	0.267	2	Phospho (+80)	800.879	1599.74	2	-0.01177	-7.352	7314.96	HAESA_2uL_Phos_0706_4uL.3195.3195.2.dta	trypsin
(R)DVFAAEVETLGtIR(H)	T743	1	2.7675	0.305	2	Phospho (+80)	800.879	1599.74	2	-0.01177	-7.352	6052.48	HAESA_2uL_Phos_0706_4uL.3502.3502.2.dta	trypsin
(R)DVFAAEVETLGtIR(H)	T743	1	3.1004	0.265	2	Phospho (+80)	800.879	1599.74	2	-0.01177	-7.352	12951.9	HAESA_2uL_Phos_0706_4uL.2191.2191.2.dta	trypsin
(R)DVFAAEVETLGtIR(H)	T743	1	2.6775	0.3127	2	Phospho (+80)	800.879	1599.74	2	-0.01177	-7.352	1781.44	HAESA_2uL_Phos_0706_4uL.4029.4029.2.dta	trypsin
(R)DVFAAEVEtLGTIR(H)	T740	1	2.6462	0.314	2	Phospho (+80)	800.879	1599.74	2	-0.01177	-7.352	15872.5	HAESA_2uL_Phos_0706_4uL.1660.1660.2.dta	trypsin
(R)DVFAAEVETLGtIR(H)	T743	1	2.8865	0.3004	2	Phospho (+80)	800.879	1599.74	2	-0.01177	-7.352	7754.98	HAESA_2uL_Phos_0706_4uL.3022.3022.2.dta	trypsin
(R)DVFAAEVETLGtIR(H)	T743	1	2.8899	0.2809	2	Phospho (+80)	800.879	1599.74	2	-0.01177	-7.352	8743.93	HAESA_2uL_Phos_0706_4uL.2510.2510.2.dta	trypsin
(R)DVFAAEVETLGtIR(H)	T743	1	2.7752	0.2679	2	Phospho (+80)	800.879	1599.74	2	-0.01177	-7.352	6048.5	HAESA_2uL_Phos_0706_4uL.3367.3367.2.dta	trypsin
(R)DVFAAEVETLGtIR(H)	T743	1	2.9905	0.2392	2	Phospho (+80)	800.879	1599.74	2	-0.01177	-7.352	7900.25	HAESA_2uL_Phos_0706_4uL.3398.3398.2.dta	trypsin
(R)DVFAAEVETLGtIR(H)	T743	1	2.518	0.2929	2	Phospho (+80)	800.879	1599.74	2	-0.01177	-7.352	8482.14	HAESA_2uL_Phos_0706_4uL.2762.2762.2.dta	trypsin
(R)DVFAAEVETLGtIR(H)	T743	1	2.8712	0.2787	2	Phospho (+80)	800.879	1599.74	2	-0.01177	-7.352	10864.2	HAESA_2uL_Phos_0706_4uL.2393.2393.2.dta	trypsin
(R)DVFAAEVETLGtIR(H)	T743	1	3.049	0.2205	2	Phospho (+80)	800.879	1599.74	2	-0.01177	-7.352	12788.6	HAESA_2uL_Phos_0706_4uL.2375.2375.2.dta	trypsin
(R)DVFAAEVETLGtIR(H)	T743	1	3.0472	0.2338	2	Phospho (+80)	800.879	1599.74	2	-0.01177	-7.352	5756.06	HAESA_2uL_Phos_0706_4uL.3528.3528.2.dta	trypsin
(R)DVFAAEVETLGtIR(H)	T743	1	2.7147	0.2248	2	Phospho (+80)	800.879	1599.74	2	-0.01177	-7.352	12174	HAESA_2uL_Phos_0706_4uL.2891.2891.2.dta	trypsin
(R)DVFAAEVETLGtIR(H)	T743	0.98	2.4537	0.2202	2	Phospho (+80)	800.879	1599.74	2	-0.01177	-7.352	7258.32	HAESA_2uL_Phos_0706_4uL.3428.3428.2.dta	trypsin
(R)DVFAAEVETLGtIR(H)	T743	0.98	2.7761	0.1695	2	Phospho (+80)	800.879	1599.74	2	-0.01177	-7.352	9642.31	HAESA_2uL_Phos_0706_4uL.2944.2944.2.dta	trypsin
(R)DVFAAEVETLGtIR(H)	T743	0.98	2.7658	0.1707	2	Phospho (+80)	800.879	1599.74	2	-0.01177	-7.352	8640.21	HAESA_2uL_Phos_0706_4uL.3037.3037.2.dta	trypsin
(R)DVFAAEVETLGtIR(H)	T743	0.98	2.3611	0.2215	2	Phospho (+80)	800.879	1599.74	2	-0.01177	-7.352	5657.38	HAESA_2uL_Phos_0706_4uL.3919.3919.2.dta	trypsin
(R)DVFAAEVETLGtIR(H)	T743	0.96	2.36	0.2109	2	Phospho (+80)	800.879	1599.74	2	-0.01177	-7.352	8237.87	HAESA_2uL_Phos_0706_4uL.3097.3097.2.dta	trypsin
(K)SSNILLDsDYGAK(V)	S829	1	3.231	0.2865	2	Phospho (+80)	731.824	1461.63	2	-0.006093	-4.166	15969.3	HAESA_2uL_Phos_0706_4uL.0843.0843.2.dta	trypsin
(K)SSNILLDsDYGAK(V)	S829	1	2.7408	0.3502	2	Phospho (+80)	731.81	1461.61	2	-0.0338	-23.11	25422.1	HAESA_2uL_Phos_0706_4uL.0860.0860.2.dta	trypsin
(K)SSNILLDsDYGAK(V)	S829	0.99	2.6615	0.2144	2	Phospho (+80)	731.824	1461.63	2	-0.006093	-4.166	8360.25	HAESA_2uL_Phos_0706_4uL.0826.0826.2.dta	trypsin
(K)LSPYYTEDLNsV(-)	S998	1	2.4598	0.3201	2	Phospho (+80)	740.812	1479.61	2	-0.007606	-5.137	10699.6	HAESA_2uL_Phos_0706_4uL.1309.1309.2.dta	trypsin
(K)LSPYYTEDLNsV(-)	S998	1	2.5794	0.292	2	Phospho (+80)	740.812	1479.61	2	-0.007606	-5.137	16251.9	HAESA_2uL_Phos_0706_4uL.1329.1329.2.dta	trypsin
(K)TPEAmsGIAGScGYIAPEYVYtLR(V)	S856/T872	0.98	4.0211	0.0608	2	Oxidation (+16), Phospho (+80), Carbamidomethyl (+57), Phospho (+80)	1391.57	2781.13	2	-0.01606	-5.772	9186.23	HAESA_2uL_Phos_0706_4uL.1791.1791.2.dta	trypsin
(K)TPEAmsGIAGScGYIAPEYVYTLR(V)	S856	1	4.893	0.5531	2	Oxidation (+16), Phospho (+80), Carbamidomethyl (+57)	1351.59	2701.17	2	-0.01197	-4.431	28098.4	HAESA_2uL_Phos_0706_4uL.1879.1879.2.dta	trypsin
(K)TPEAmsGIAGScGYIAPEYVYTLR(V)	S856	1	4.9883	0.5317	2	Oxidation (+16), Phospho (+80), Carbamidomethyl (+57)	1351.59	2701.17	2	-0.01197	-4.431	23307.4	HAESA_2uL_Phos_0706_4uL.1836.1836.2.dta	trypsin
(K)TPEAmsGIAGScGYIAPEYVYTLR(V)	S856	1	4.5536	0.5372	2	Oxidation (+16), Phospho (+80), Carbamidomethyl (+57)	1351.59	2701.17	2	-0.01197	-4.431	31243.8	HAESA_2uL_Phos_0706_4uL.1854.1854.2.dta	trypsin
(K)TPEAmsGIAGScGYIAPEYVYTLR(V)	S856	1	4.6725	0.5192	2	Oxidation (+16), Phospho (+80), Carbamidomethyl (+57)	1351.59	2701.17	2	-0.01197	-4.431	16881	HAESA_2uL_Phos_0706_4uL.1938.1938.2.dta	trypsin
(K)TPEAmsGIAGScGYIAPEYVYTLR(V)	S856	1	4.189	0.5391	2	Oxidation (+16), Phospho (+80), Carbamidomethyl (+57)	1351.59	2701.17	2	-0.01197	-4.431	13889	HAESA_2uL_Phos_0706_4uL.1959.1959.2.dta	trypsin
(K)TPEAmsGIAGScGYIAPEYVYTLR(V)	S856	1	4.8799	0.4861	2	Oxidation (+16), Phospho (+80), Carbamidomethyl (+57)	1351.59	2701.17	2	-0.01197	-4.431	20403.1	HAESA_2uL_Phos_0706_4uL.1918.1918.2.dta	trypsin
(K)TPEAmsGIAGScGYIAPEYVYTLR(V)	S856	1	4.2816	0.5162	2	Oxidation (+16), Phospho (+80), Carbamidomethyl (+57)	1351.59	2701.17	2	-0.01197	-4.431	28182.6	HAESA_2uL_Phos_0706_4uL.1898.1898.2.dta	trypsin
(K)TPEAmsGIAGScGYIAPEYVYTLR(V)	S856	1	4.2333	0.4953	2	Oxidation (+16), Phospho (+80), Carbamidomethyl (+57)	1351.59	2701.17	2	-0.01197	-4.431	9024.78	HAESA_2uL_Phos_0706_4uL.1990.1990.2.dta	trypsin
(K)TPEAmsGIAGScGYIAPEYVYTLR(V)	S856	1	4.0212	0.423	2	Oxidation (+16), Phospho (+80), Carbamidomethyl (+57)	901.399	2701.18	3	-0.00404	-1.495	36409.4	HAESA_2uL_Phos_0706_4uL.1859.1859.3.dta	trypsin
(K)TPEAmsGIAGScGYIAPEYVYTLR(V)	S856	1	3.9608	0.3913	2	Oxidation (+16), Phospho (+80), Carbamidomethyl (+57)	901.399	2701.18	3	-0.00404	-1.495	15735.5	HAESA_2uL_Phos_0706_4uL.1965.1965.3.dta	trypsin
(K)TPEAmsGIAGScGYIAPEYVYTLR(V)	S856	1	3.8367	0.3921	2	Oxidation (+16), Phospho (+80), Carbamidomethyl (+57)	901.399	2701.18	3	-0.00404	-1.495	20217.5	HAESA_2uL_Phos_0706_4uL.1919.1919.3.dta	trypsin
(K)TPEAmsGIAGScGYIAPEYVYTLR(V)	S856	1	4.0658	0.3859	2	Oxidation (+16), Phospho (+80), Carbamidomethyl (+57)	901.399	2701.18	3	-0.00404	-1.495	29340.8	HAESA_2uL_Phos_0706_4uL.1899.1899.3.dta	trypsin
(K)TPEAmsGIAGScGYIAPEYVYTLR(V)	S856	1	3.8375	0.409	2	Oxidation (+16), Phospho (+80), Carbamidomethyl (+57)	1351.59	2701.17	2	-0.01197	-4.431	13774.4	HAESA_2uL_Phos_0706_4uL.2037.2037.2.dta	trypsin
(K)TPEAmsGIAGScGYIAPEYVYTLR(V)	S856	1	3.523	0.3699	2	Oxidation (+16), Phospho (+80), Carbamidomethyl (+57)	1352.09	2702.17	2	0.9852	-6.490 (+1 neutron corrected from 364.5)	8524.67	HAESA_2uL_Phos_0706_4uL.2007.2007.2.dta	trypsin
(K)TPEAmsGIAGScGYIAPEYVYTLR(V)	S856	1	2.8848	0.3306	2	Oxidation (+16), Phospho (+80), Carbamidomethyl (+57)	1351.59	2701.17	2	-0.01197	-4.431	12949.4	HAESA_2uL_Phos_0706_4uL.2019.2019.2.dta	trypsin
(K)TPEAmsGIAGScGYIAPEYVYTLR(V)	S856	1	3.0367	0.2541	2	Oxidation (+16), Phospho (+80), Carbamidomethyl (+57)	901.399	2701.18	3	-0.00404	-1.495	18383.9	HAESA_2uL_Phos_0706_4uL.1939.1939.3.dta	trypsin
(K)TPEAmsGIAGScGYIAPEYVYTLR(V)	S856	1	4.8296	0.1069	2	Oxidation (+16), Phospho (+80), Carbamidomethyl (+57)	1351.59	2701.17	2	-0.01197	-4.431	12582.4	HAESA_2uL_Phos_0706_4uL.1979.1979.2.dta	trypsin
(K)TPEAmsGIAGScGYIAPEYVYTLR(V)	S856	1	3.389	0.2535	2	Oxidation (+16), Phospho (+80), Carbamidomethyl (+57)	901.75	2702.23	3	1.047	16.22 (+1 neutron corrected from 387.2)	13463.3	HAESA_2uL_Phos_0706_4uL.2013.2013.3.dta	trypsin
(R)KVVImLQEVSGAVPcSSPNtSKR(S)	T978	1	4.3115	0.4884	2	Oxidation (+16), Carbamidomethyl (+57), Phospho (+80)	861.761	2582.26	3	0.002721	1.053	15322.6	HAESA_2uL_Phos_0706_4uL.0811.0811.3.dta	trypsin
(R)KVVImLQEVSGAVPcSSPNtSKR(S)	T978	1	4.1601	0.4281	2	Oxidation (+16), Carbamidomethyl (+57), Phospho (+80)	861.761	2582.26	3	0.002721	1.053	40721.5	HAESA_2uL_Phos_0706_4uL.0830.0830.3.dta	trypsin
(R)KVVImLQEVSGAVPcSSPNtSKR(S)	T978	1	4.5172	0.3803	2	Oxidation (+16), Carbamidomethyl (+57), Phospho (+80)	861.761	2582.26	3	0.002721	1.053	40994.8	HAESA_2uL_Phos_0706_4uL.0848.0848.3.dta	trypsin
(R)KVVImLQEVSGAVPcSSPNtSKR(S)	T978	1	3.5625	0.3054	2	Oxidation (+16), Carbamidomethyl (+57), Phospho (+80)	646.579	2582.29	4	0.027	10.45	26693.5	HAESA_2uL_Phos_0706_4uL.0839.0839.4.dta	trypsin
(R)KVVImLQEVSGAVPcSSPNtSKR(S)	T978	1	3.8314	0.2648	2	Oxidation (+16), Carbamidomethyl (+57), Phospho (+80)	646.579	2582.29	4	0.027	10.45	19590.4	HAESA_2uL_Phos_0706_4uL.0821.0821.4.dta	trypsin
(R)KVVImLQEVSGAVPcSSPNtSKR(S)	T978	1	3.6932	0.3042	2	Oxidation (+16), Carbamidomethyl (+57), Phospho (+80)	862.096	2583.27	3	1.007	1.529 (+1 neutron corrected from 389.5)	10427.5	HAESA_2uL_Phos_0706_4uL.0896.0896.3.dta	trypsin
(R)KVVImLQEVSGAVPcSSPNTsKR(S)	S979	1	3.821	0.2851	2	Oxidation (+16), Carbamidomethyl (+57), Phospho (+80)	861.761	2582.26	3	0.002721	1.053	14649.3	HAESA_2uL_Phos_0706_4uL.0868.0868.3.dta	trypsin
(R)KVVImLQEVSGAVPcSSPNtSKR(S)	T978	1	4.0942	0.1917	2	Oxidation (+16), Carbamidomethyl (+57), Phospho (+80)	646.579	2582.29	4	0.027	10.45	17111.6	HAESA_2uL_Phos_0706_4uL.0856.0856.4.dta	trypsin
(R)KVVImLQEVSGAVPcSSPNtSKR(S)	T978	0.97	3.1824	0.1347	2	Oxidation (+16), Carbamidomethyl (+57), Phospho (+80)	861.761	2582.26	3	0.002721	1.053	25233.4	HAESA_2uL_Phos_0706_4uL.1087.1087.3.dta	trypsin
(R)KVVImLQEVSGAVPcSSPNtSKR(S)	T978	0.95	3.2188	0.1656	2	Oxidation (+16), Carbamidomethyl (+57), Phospho (+80)	861.761	2582.26	3	0.002721	1.053	33645.5	HAESA_2uL_Phos_0706_4uL.1067.1067.3.dta	trypsin
(K)VVImLQEVSGAVPcSSPNtSK(R)	T978	1	4.2507	0.4041	2	Oxidation (+16), Carbamidomethyl (+57), Phospho (+80)	1150.03	2298.04	2	-0.0195	-8.48	9579.16	HAESA_2uL_Phos_0706_4uL.1253.1253.2.dta	trypsin
(K)VVImLQEVSGAVPcSSPNtSKR(S)	T978	1	4.8871	0.4164	2	Oxidation (+16), Carbamidomethyl (+57), Phospho (+80)	819.06	2454.16	3	-0.00542	-2.207	22774.5	HAESA_2uL_Phos_0706_4uL.1033.1033.3.dta	trypsin
(K)VVImLQEVSGAVPcSSPNtSKR(S)	T978	1	4.2765	0.3686	2	Oxidation (+16), Carbamidomethyl (+57), Phospho (+80)	819.06	2454.16	3	-0.00542	-2.207	33338.6	HAESA_2uL_Phos_0706_4uL.1053.1053.3.dta	trypsin
(K)VVImLQEVSGAVPcSSPNtSKR(S)	T978	1	4.1215	0.353	2	Oxidation (+16), Carbamidomethyl (+57), Phospho (+80)	819.06	2454.16	3	-0.00542	-2.207	9569.82	HAESA_2uL_Phos_0706_4uL.1075.1075.3.dta	trypsin
(K)VVImLQEVSGAVPcSSPNtSKR(S)	T978	1	3.4757	0.3276	2	Oxidation (+16), Carbamidomethyl (+57), Phospho (+80)	819.394	2455.16	3	0.9962	-2.678 (+1 neutron corrected from 405.6)	17626.4	HAESA_2uL_Phos_0706_4uL.1426.1426.3.dta	trypsin
(K)VVImLQEVSGAVPcSSPNtSKR(S)	T978	1	4.6041	0.2381	2	Oxidation (+16), Carbamidomethyl (+57), Phospho (+80)	819.06	2454.16	3	-0.00542	-2.207	25513.4	HAESA_2uL_Phos_0706_4uL.1405.1405.3.dta	trypsin
(K)VVImLQEVSGAVPcSSPNTsKR(S)	S979	0.99	3.4798	0.1613	2	Oxidation (+16), Carbamidomethyl (+57), Phospho (+80)	819.06	2454.16	3	-0.00542	-2.207	19036.8	HAESA_2uL_Phos_0706_4uL.1387.1387.3.dta	trypsin
(K)TPEAMSGIAGScGYIAPEYVYtLR(V)	T872	1	5.3262	0.0616	2	Carbamidomethyl (+57), Phospho (+80)	1343.59	2685.17	2	-0.0142	-5.287	11834.6	HAESA_2uL_Phos_0706_4uL.1887.1887.2.dta	trypsin
(K)TPEAMSGIAGScGYIAPEYVYtLR(V)	T872	0.99	5.0966	0.0069	2	Carbamidomethyl (+57), Phospho (+80)	1343.59	2685.17	2	-0.0142	-5.287	12165	HAESA_2uL_Phos_0706_4uL.1889.1889.2.dta	trypsin
(R)KVVIMLQEVSGAVPcSSPNTsK(R)	S979	1	3.2653	0.2744	2	Carbamidomethyl (+57), Phospho (+80)	804.394	2410.16	3	-0.004711	-1.954	15650	HAESA_2uL_Phos_0706_4uL.1283.1283.3.dta	trypsin
(R)KVVIMLQEVSGAVPcSSPNtSKR(S)	T978	1	5.0405	0.5214	2	Carbamidomethyl (+57), Phospho (+80)	856.425	2566.25	3	-0.01156	-4.502	28348.2	HAESA_2uL_Phos_0706_4uL.1148.1148.3.dta	trypsin
(R)KVVIMLQEVSGAVPcSSPNTsKR(S)	S979	1	4.689	0.5312	2	Carbamidomethyl (+57), Phospho (+80)	856.425	2566.25	3	-0.01156	-4.502	43253.4	HAESA_2uL_Phos_0706_4uL.1054.1054.3.dta	trypsin
(R)KVVIMLQEVSGAVPcSSPNtSKR(S)	T978	1	4.1311	0.4774	2	Carbamidomethyl (+57), Phospho (+80)	856.425	2566.25	3	-0.01156	-4.502	43721.2	HAESA_2uL_Phos_0706_4uL.1111.1111.3.dta	trypsin
(R)KVVIMLQEVSGAVPcSSPNtSKR(S)	T978	1	4.4631	0.4484	2	Carbamidomethyl (+57), Phospho (+80)	856.425	2566.25	3	-0.01156	-4.502	29300.3	HAESA_2uL_Phos_0706_4uL.1129.1129.3.dta	trypsin
(R)KVVIMLQEVSGAVPcSSPNtSKR(S)	T978	1	4.1121	0.4188	2	Carbamidomethyl (+57), Phospho (+80)	856.425	2566.25	3	-0.01156	-4.502	12357.9	HAESA_2uL_Phos_0706_4uL.1254.1254.3.dta	trypsin
(R)KVVIMLQEVSGAVPcSSPNTsKR(S)	S979	1	4.5582	0.3722	2	Carbamidomethyl (+57), Phospho (+80)	856.425	2566.25	3	-0.01156	-4.502	32397.2	HAESA_2uL_Phos_0706_4uL.1182.1182.3.dta	trypsin
(R)KVVIMLQEVSGAVPcSSPNtSKR(S)	T978	1	3.4757	0.4171	2	Carbamidomethyl (+57), Phospho (+80)	856.425	2566.25	3	-0.01156	-4.502	12774.5	HAESA_2uL_Phos_0706_4uL.1226.1226.3.dta	trypsin
(R)KVVIMLQEVSGAVPcSSPNTsKR(S)	S979	1	4.0494	0.3862	2	Carbamidomethyl (+57), Phospho (+80)	856.425	2566.25	3	-0.01156	-4.502	27544.4	HAESA_2uL_Phos_0706_4uL.1166.1166.3.dta	trypsin
(R)KVVIMLQEVSGAVPcSSPNtSKR(S)	T978	1	3.6737	0.3914	2	Carbamidomethyl (+57), Phospho (+80)	856.425	2566.25	3	-0.01156	-4.502	16537.4	HAESA_2uL_Phos_0706_4uL.1034.1034.3.dta	trypsin
(R)KVVIMLQEVSGAVPcSSPNtSKR(S)	T978	1	4.1021	0.3694	2	Carbamidomethyl (+57), Phospho (+80)	642.572	2566.26	4	-0.006743	-2.627	29471.7	HAESA_2uL_Phos_0706_4uL.1057.1057.4.dta	trypsin
(R)KVVIMLQEVSGAVPcSSPNtSKR(S)	T978	1	3.6351	0.2956	2	Carbamidomethyl (+57), Phospho (+80)	642.572	2566.26	4	-0.006743	-2.627	24548.3	HAESA_2uL_Phos_0706_4uL.1133.1133.4.dta	trypsin
(R)KVVIMLQEVSGAVPcSSPNtSKR(S)	T978	1	3.8085	0.283	2	Carbamidomethyl (+57), Phospho (+80)	856.425	2566.25	3	-0.01156	-4.502	8458.37	HAESA_2uL_Phos_0706_4uL.1435.1435.3.dta	trypsin
(R)KVVIMLQEVSGAVPcSSPNtSKR(S)	T978	1	4.0064	0.2354	2	Carbamidomethyl (+57), Phospho (+80)	642.572	2566.26	4	-0.006743	-2.627	24573.6	HAESA_2uL_Phos_0706_4uL.1077.1077.4.dta	trypsin
(R)KVVIMLQEVSGAVPcSSPNtSKR(S)	T978	1	3.3121	0.2338	2	Carbamidomethyl (+57), Phospho (+80)	642.572	2566.26	4	-0.006743	-2.627	33473.1	HAESA_2uL_Phos_0706_4uL.1097.1097.4.dta	trypsin
(R)KVVIMLQEVSGAVPcSSPNtSKR(S)	T978	1	3.3666	0.1652	2	Carbamidomethyl (+57), Phospho (+80)	856.425	2566.25	3	-0.01156	-4.502	17974.5	HAESA_2uL_Phos_0706_4uL.1204.1204.3.dta	trypsin
(R)KVVIMLQEVSGAVPcSSPNtSKR(S)	T978	0.98	5.7137	0.0235	2	Carbamidomethyl (+57), Phospho (+80)	856.425	2566.25	3	-0.01156	-4.502	64286.4	HAESA_2uL_Phos_0706_4uL.1092.1092.3.dta	trypsin
(K)VVIMLQEVSGAVPcSSPNtSK(R)	T978	1	5.2445	0.5342	2	Carbamidomethyl (+57), Phospho (+80)	1142.04	2282.06	2	-0.01306	-5.719	18875.4	HAESA_2uL_Phos_0706_4uL.1683.1683.2.dta	trypsin
(K)VVIMLQEVSGAVPcSSPNTsK(R)	S979	1	4.9424	0.4672	2	Carbamidomethyl (+57), Phospho (+80)	1142.04	2282.06	2	-0.01306	-5.719	19985.7	HAESA_2uL_Phos_0706_4uL.1703.1703.2.dta	trypsin
(K)VVIMLQEVSGAVPcSSPNtSK(R)	T978	1	4.9932	0.0277	2	Carbamidomethyl (+57), Phospho (+80)	1142.04	2282.06	2	-0.01306	-5.719	29034.6	HAESA_2uL_Phos_0706_4uL.1663.1663.2.dta	trypsin
(K)VVIMLQEVSGAVPcSSPNtSK(R)	T978	0.99	4.2317	0.0627	2	Carbamidomethyl (+57), Phospho (+80)	1142.04	2282.06	2	-0.01306	-5.719	15296.1	HAESA_2uL_Phos_0706_4uL.1643.1643.2.dta	trypsin
(K)VVIMLQEVSGAVPcSSPNtSKR(S)	T978	1	5.1876	0.4711	2	Carbamidomethyl (+57), Phospho (+80)	813.725	2438.15	3	-0.0183	-7.503	34422.3	HAESA_2uL_Phos_0706_4uL.1393.1393.3.dta	trypsin
(K)VVIMLQEVSGAVPcSSPNtSKR(S)	T978	1	4.8481	0.4163	2	Carbamidomethyl (+57), Phospho (+80)	813.725	2438.15	3	-0.0183	-7.503	14624.1	HAESA_2uL_Phos_0706_4uL.1488.1488.3.dta	trypsin
(K)VVIMLQEVSGAVPcSSPNTsKR(S)	S979	1	4.6801	0.4035	2	Carbamidomethyl (+57), Phospho (+80)	813.725	2438.15	3	-0.0183	-7.503	31002	HAESA_2uL_Phos_0706_4uL.1451.1451.3.dta	trypsin
(K)VVIMLQEVSGAVPcSSPNTsKR(S)	S979	1	3.9541	0.42	2	Carbamidomethyl (+57), Phospho (+80)	813.725	2438.15	3	-0.0183	-7.503	21861.3	HAESA_2uL_Phos_0706_4uL.1463.1463.3.dta	trypsin
(K)VVIMLQEVSGAVPcSSPNtSKR(S)	T978	1	3.963	0.3953	2	Carbamidomethyl (+57), Phospho (+80)	813.725	2438.15	3	-0.0183	-7.503	17477.3	HAESA_2uL_Phos_0706_4uL.1474.1474.3.dta	trypsin
(K)VVIMLQEVSGAVPcSSPNTsKR(S)	S979	1	3.4036	0.2768	2	Carbamidomethyl (+57), Phospho (+80)	814.061	2439.16	3	0.9908	-4.905 (+1 neutron corrected from 406.0)	12125.7	HAESA_2uL_Phos_0706_4uL.1502.1502.3.dta	trypsin
(K)VVIMLQEVSGAVPcSSPNtSKR(S)	T978	0.98	4.1119	0.0461	2	Carbamidomethyl (+57), Phospho (+80)	1220.08	2438.14	2	-0.02558	-10.49	10849.4	HAESA_2uL_Phos_0706_4uL.1396.1396.2.dta	trypsin
(D)FGIAKVGQMSGSKtPEAMsGIAGScGYIAPE(Y)	T851/S856	1	2.89	0.2595	2	Phospho (+80), Phospho (+80), Carbamidomethyl (+57)	1087.8	3260.39	3	-0.008389	-2.572	62707.2	Glu-Cdigest_2uL_phos_1.1586.1586.3.dta	Glu-C
(E)VETLGtIRHKSIVRLWcccSSGDcKLLVYE(Y)	T743	1	3.2336	0.2297	2	Phospho (+80), Carbamidomethyl (+57), Carbamidomethyl (+57), Carbamidomethyl (+57), Carbamidomethyl (+57)	930.691	3718.73	4	-0.01613	-4.335	83941.5	Glu-Cdigest_2uL_phos_1.1558.1558.4.dta	Glu-C
(E)TLGtIRHKSIVRLWcccSSGDcKLLVYE(Y)	T743	1	3.9811	0.355	2	Phospho (+80), Carbamidomethyl (+57), Carbamidomethyl (+57), Carbamidomethyl (+57), Carbamidomethyl (+57)	873.664	3490.63	4	-0.01016	-2.909	88331.6	Glu-Cdigest_2uL_phos_1.1498.1498.4.dta	Glu-C
(E)TLGtIRHKSIVRLWcccSSGDcKLLVYE(Y)	T743	1	3.2887	0.2875	2	Phospho (+80), Carbamidomethyl (+57), Carbamidomethyl (+57), Carbamidomethyl (+57), Carbamidomethyl (+57)	873.664	3490.63	4	-0.01016	-2.909	97501.2	Glu-Cdigest_2uL_phos_1.1487.1487.4.dta	Glu-C
(E)TLGtIRHKSIVRLWcccSSGDcKLLVYE(Y)	T743	1	3.9066	0.2396	2	Phospho (+80), Carbamidomethyl (+57), Carbamidomethyl (+57), Carbamidomethyl (+57), Carbamidomethyl (+57)	873.664	3490.63	4	-0.01016	-2.909	81660.1	Glu-Cdigest_2uL_phos_1.1500.1500.4.dta	Glu-C
(E)TLGtIRHKSIVRLWcccSSGDcKLLVYE(Y)	T743	1	3.699	0.2405	2	Phospho (+80), Carbamidomethyl (+57), Carbamidomethyl (+57), Carbamidomethyl (+57), Carbamidomethyl (+57)	873.664	3490.63	4	-0.01016	-2.909	102221	Glu-Cdigest_2uL_phos_1.1489.1489.4.dta	Glu-C
(E)TLGtIRHKSIVRLWcccSSGDcKLLVYE(Y)	T743	1	3.5208	0.2477	2	Phospho (+80), Carbamidomethyl (+57), Carbamidomethyl (+57), Carbamidomethyl (+57), Carbamidomethyl (+57)	873.664	3490.63	4	-0.01016	-2.909	95165.1	Glu-Cdigest_2uL_phos_1.1494.1494.4.dta	Glu-C
(E)AMsGIAGScGYIAPE(Y)	S856	1	2.3641	0.3734	2	Phospho (+80), Carbamidomethyl (+57)	782.312	1562.61	2	-0.005056	-3.234	45846.2	Glu-Cdigest_2uL_phos_1.1321.1321.2.dta	Glu-C
(E)AMsGIAGScGYIAPEYVYTLRVNE(K)	S856	1	4.8611	0.6549	2	Phospho (+80), Carbamidomethyl (+57)	1351.1	2700.18	2	-0.01399	-5.18	35542	Glu-Cdigest_2uL_phos_1.2070.2070.2.dta	Glu-C
(E)AMsGIAGScGYIAPEYVYTLRVNE(K)	S856	1	4.9352	0.6494	2	Phospho (+80), Carbamidomethyl (+57)	1351.1	2700.18	2	-0.01399	-5.18	48192.4	Glu-Cdigest_2uL_phos_1.2074.2074.2.dta	Glu-C
(E)AMsGIAGScGYIAPEYVYTLRVNE(K)	S856	1	4.8681	0.6262	2	Phospho (+80), Carbamidomethyl (+57)	1351.1	2700.18	2	-0.01399	-5.18	28212.4	Glu-Cdigest_2uL_phos_1.2087.2087.2.dta	Glu-C
(E)AMsGIAGScGYIAPEYVYTLRVNE(K)	S856	1	4.8081	0.6256	2	Phospho (+80), Carbamidomethyl (+57)	1351.1	2700.18	2	-0.01399	-5.18	48549.4	Glu-Cdigest_2uL_phos_1.2079.2079.2.dta	Glu-C
(E)AMsGIAGScGYIAPEYVYTLRVNE(K)	S856	1	4.4114	0.6423	2	Phospho (+80), Carbamidomethyl (+57)	1351.1	2700.18	2	-0.01399	-5.18	38980.3	Glu-Cdigest_2uL_phos_1.2083.2083.2.dta	Glu-C
(E)AMsGIAGScGYIAPEYVYTLRVNE(K)	S856	1	4.3607	0.5855	2	Phospho (+80), Carbamidomethyl (+57)	1351.1	2700.18	2	-0.01399	-5.18	49300.1	Glu-Cdigest_2uL_phos_1.2076.2076.2.dta	Glu-C
(E)AMsGIAGScGYIAPEYVYTLRVNE(K)	S856	1	3.8865	0.5836	2	Phospho (+80), Carbamidomethyl (+57)	1351.1	2700.18	2	-0.01399	-5.18	21567.5	Glu-Cdigest_2uL_phos_1.2090.2090.2.dta	Glu-C
(E)AMsGIAGScGYIAPEYVYTLRVNE(K)	S856	1	3.7137	0.452	2	Phospho (+80), Carbamidomethyl (+57)	901.068	2700.18	3	-0.01549	-5.734	53605.9	Glu-Cdigest_2uL_phos_1.2082.2082.3.dta	Glu-C
(E)AMsGIAGScGYIAPEYVYTLRVNE(K)	S856	1	3.63	0.3689	2	Phospho (+80), Carbamidomethyl (+57)	901.068	2700.18	3	-0.01549	-5.734	52976.9	Glu-Cdigest_2uL_phos_1.2073.2073.3.dta	Glu-C
(E)AMsGIAGScGYIAPEYVYTLRVNE(K)	S856	1	3.7186	0.3411	2	Phospho (+80), Carbamidomethyl (+57)	901.068	2700.18	3	-0.01549	-5.734	47675.2	Glu-Cdigest_2uL_phos_1.2071.2071.3.dta	Glu-C
(E)AMsGIAGScGYIAPEYVYTLRVNE(K)	S856	1	3.2292	0.2915	2	Phospho (+80), Carbamidomethyl (+57)	901.068	2700.18	3	-0.01549	-5.734	41671.5	Glu-Cdigest_2uL_phos_1.2069.2069.3.dta	Glu-C
(E)AMsGIAGScGYIAPEYVYTLRVNE(K)	S856	1	3.0787	0.2886	2	Phospho (+80), Carbamidomethyl (+57)	901.068	2700.18	3	-0.01549	-5.734	46625.8	Glu-Cdigest_2uL_phos_1.2085.2085.3.dta	Glu-C
(E)YVYtLRVNE(K)	T872	1	2.0591	0.2943	2	Phospho (+80)	618.784	1235.55	2	-0.006278	-5.077	33069.9	Glu-Cdigest_2uL_phos_1.1121.1121.2.dta	Glu-C
(E)YVYtLRVNE(K)	T872	1	2.0748	0.2637	2	Phospho (+80)	618.784	1235.55	2	-0.006278	-5.077	26404.8	Glu-Cdigest_2uL_phos_1.1126.1126.2.dta	Glu-C
(E)YVYtLRVNE(K)	T872	1	1.9986	0.2762	2	Phospho (+80)	618.784	1235.55	2	-0.006278	-5.077	13062.5	Glu-Cdigest_2uL_phos_1.1135.1135.2.dta	Glu-C
(E)YVYtLRVNE(K)	T872	1	1.9577	0.2996	2	Phospho (+80)	618.784	1235.55	2	-0.006278	-5.077	13019.6	Glu-Cdigest_2uL_phos_1.1132.1132.2.dta	Glu-C
(E)YVYtLRVNE(K)	T872	1	2.001	0.2775	2	Phospho (+80)	618.784	1235.55	2	-0.006278	-5.077	20986.2	Glu-Cdigest_2uL_phos_1.1154.1154.2.dta	Glu-C
(E)YVYtLRVNE(K)	T872	1	1.7952	0.3038	2	Phospho (+80)	618.784	1235.55	2	-0.006278	-5.077	10524.6	Glu-Cdigest_2uL_phos_1.1147.1147.2.dta	Glu-C
(E)YVYtLRVNE(K)	T872	1	2.0221	0.2644	2	Phospho (+80)	618.784	1235.55	2	-0.006278	-5.077	14016.1	Glu-Cdigest_2uL_phos_1.1138.1138.2.dta	Glu-C
(E)YVYtLRVNE(K)	T872	1	1.8573	0.2457	2	Phospho (+80)	618.784	1235.55	2	-0.006278	-5.077	35954.4	Glu-Cdigest_2uL_phos_1.1123.1123.2.dta	Glu-C
(E)YVYtLRVNE(K)	T872	0.99	2.1878	0.1761	2	Phospho (+80)	618.784	1235.55	2	-0.006278	-5.077	11970.9	Glu-Cdigest_2uL_phos_1.1129.1129.2.dta	Glu-C
(E)YVYtLRVNE(K)	T872	0.98	1.7142	0.241	2	Phospho (+80)	618.784	1235.55	2	-0.006278	-5.077	12361.2	Glu-Cdigest_2uL_phos_1.1151.1151.2.dta	Glu-C
(E)YVYtLRVNE(K)	T872	0.98	1.7935	0.246	2	Phospho (+80)	618.784	1235.55	2	-0.006278	-5.077	26496	Glu-Cdigest_2uL_phos_1.1164.1164.2.dta	Glu-C
(E)AmsGIAGScGYIAPE(Y)	S856	1	2.266	0.2953	2	Oxidation (+16), Phospho (+80), Carbamidomethyl (+57)	790.308	1578.6	2	-0.008284	-5.244	32763.4	Glu-Cdigest_2uL_phos_1.0970.0970.2.dta	Glu-C
(E)AmsGIAGScGYIAPE(Y)	S856	1	2.2496	0.3126	2	Oxidation (+16), Phospho (+80), Carbamidomethyl (+57)	790.308	1578.6	2	-0.008284	-5.244	34977	Glu-Cdigest_2uL_phos_1.0962.0962.2.dta	Glu-C
(E)AmsGIAGScGYIAPE(Y)	S856	1	2.1744	0.2567	2	Oxidation (+16), Phospho (+80), Carbamidomethyl (+57)	790.308	1578.6	2	-0.008284	-5.244	32337.3	Glu-Cdigest_2uL_phos_1.0973.0973.2.dta	Glu-C
(E)VSGAVPcSSPNTSKRSKtGGKLSPYYTEDLNsV(-)	S998	0.98	4.8173	0.0594	2	Carbamidomethyl (+57), Phospho (+80), Phospho (+80)	912.414	3645.63	4	-0.01544	-4.234	100358	Glu-Cdigest_2uL_phos_1.0939.0939.4.dta	Glu-C
(E)VSGAVPcSSPNTsKRSKTGGKLSPYYTE(D)	S979	0.97	3.3124	0.1493	2	Carbamidomethyl (+57), Phospho (+80)	760.36	3037.41	4	-0.01277	-4.202	24122.3	Glu-Cdigest_2uL_phos_1.0483.0483.4.dta	Glu-C
(E)VSGAVPcSSPNTsKRSKTGGKLSPYYTEDLNSV(-)	S979	0.99	3.2854	0.1589	2	Carbamidomethyl (+57), Phospho (+80)	892.422	3565.66	4	-0.01597	-4.476	69815.3	Glu-Cdigest_2uL_phos_1.0915.0915.4.dta	Glu-C
MBP-HAE-T851A (replicate 1)
(K)GGDDEYsSDSLNR(D)	S725	0.95	2.7954	0.7349	2	Phospho (+80)	747.771	1493.53	2	-0.002485	-1.663	14096	HAE-T851A_TiO2-exposed.02201.02201.2.dta	trypsin
(K)GGDDEySSDSLNR(D)	Y724	0.95	4.0244	0.7117	2	Phospho (+80)	747.77	1493.53	2	-0.004682	-3.133	183450	HAE-T851A_TiO2-exposed.01752.01752.2.dta	trypsin
(K)GGDDEYsSDSLNR(D)	S725	0.95	3.3625	0.735	2	Phospho (+80)	747.772	1493.53	2	-0.00102	-0.6828	20780	HAE-T851A_TiO2-purified.02706.02706.2.dta	trypsin
(K)GGDDEySSDSLNR(D)	Y724	0.95	3.7712	0.7418	2	Phospho (+80)	747.771	1493.53	2	-0.003095	-2.071	29349	HAE-T851A_TiO2-purified.02319.02319.2.dta	trypsin
(R)DVFAAEVEtLGTIR(H)	T740	0.95	1.1783	0.3439	2	Phospho (+80)	534.257	1599.75	3	-0.004923	-3.076	3001	HAE-T851A_TiO2-exposed.09668.09668.3.dta	trypsin
(R)DVFAAEVETLGtIR(H)	T743	0.95	1.4572	0.4063	2	Phospho (+80)	800.883	1599.75	2	-0.004239	-2.648	6000	HAE-T851A_TiO2-exposed.05884.05884.2.dta	trypsin
(R)DVFAAEVETLGtIR(H)	T743	0.95	1.0366	0.5654	2	Phospho (+80)	800.882	1599.75	2	-0.004483	-2.801	2454	HAE-T851A_TiO2-exposed.08050.08050.2.dta	trypsin
(R)DVFAAEVETLGtIR(H)	T743	0.95	1.4474	0.3719	2	Phospho (+80)	534.256	1599.75	3	-0.008402	-5.249	1923	HAE-T851A_TiO2-exposed.05957.05957.3.dta	trypsin
(R)DVFAAEVETLGtIR(H)	T743	0.95	1.3592	0.6124	2	Phospho (+80)	800.882	1599.75	2	-0.004483	-2.801	8826	HAE-T851A_TiO2-exposed.05572.05572.2.dta	trypsin
(R)DVFAAEVETLGtIR(H)	T743	0.95	1.0362	0.7198	2	Phospho (+80)	800.881	1599.75	2	-0.008023	-5.012	1865	HAE-T851A_TiO2-exposed.08794.08794.2.dta	trypsin
(R)DVFAAEVETLGtIR(H)	T743	0.95	1.2342	0.6647	2	Phospho (+80)	800.882	1599.75	2	-0.004361	-2.725	2323	HAE-T851A_TiO2-exposed.06794.06794.2.dta	trypsin
(R)DVFAAEVETLGtIR(H)	T743	0.95	1.3798	0.6544	2	Phospho (+80)	800.883	1599.75	2	-0.004117	-2.572	1395	HAE-T851A_TiO2-exposed.09260.09260.2.dta	trypsin
(R)DVFAAEVETLGtIR(H)	T743	0.95	1.4221	0.6799	2	Phospho (+80)	800.882	1599.75	2	-0.004361	-2.725	1578	HAE-T851A_TiO2-exposed.09595.09595.2.dta	trypsin
(R)DVFAAEVETLGtIR(H)	T743	0.95	1.5942	0.546	2	Phospho (+80)	534.257	1599.75	3	-0.004557	-2.847	4164	HAE-T851A_TiO2-exposed.06430.06430.3.dta	trypsin
(R)DVFAAEVETLGtIR(H)	T743	0.95	1.8242	0.7365	2	Phospho (+80)	800.881	1599.75	2	-0.008145	-5.089	3312	HAE-T851A_TiO2-exposed.07747.07747.2.dta	trypsin
(R)DVFAAEVETLGtIR(H)	T743	0.95	2.4485	0.7075	2	Phospho (+80)	800.882	1599.75	2	-0.004849	-3.029	2972	HAE-T851A_TiO2-exposed.10164.10164.2.dta	trypsin
(R)DVFAAEVETLGtIR(H)	T743	0.95	2.2893	0.7303	2	Phospho (+80)	800.884	1599.75	2	-0.0006995	-0.437	2068	HAE-T851A_TiO2-exposed.10958.10958.2.dta	trypsin
(R)DVFAAEVETLGtIR(H)	T743	0.95	2.8265	0.6927	2	Phospho (+80)	800.882	1599.75	2	-0.005582	-3.487	4546	HAE-T851A_TiO2-exposed.07445.07445.2.dta	trypsin
(R)DVFAAEVETLGtIR(H)	T743	0.95	2.8833	0.6914	2	Phospho (+80)	800.882	1599.75	2	-0.005582	-3.487	3423	HAE-T851A_TiO2-exposed.09885.09885.2.dta	trypsin
(R)DVFAAEVETLGtIR(H)	T743	0.95	2.7743	0.7072	2	Phospho (+80)	800.883	1599.75	2	-0.003262	-2.038	2513	HAE-T851A_TiO2-exposed.10696.10696.2.dta	trypsin
(R)DVFAAEVETLGtIR(H)	T743	0.95	2.7202	0.7248	2	Phospho (+80)	800.883	1599.75	2	-0.00314	-1.962	3256	HAE-T851A_TiO2-exposed.10432.10432.2.dta	trypsin
(R)DVFAAEVETLGtIR(H)	T743	0.95	2.519	0.786	2	Phospho (+80)	800.881	1599.75	2	-0.007413	-4.631	7037	HAE-T851A_TiO2-exposed.06492.06492.2.dta	trypsin
(R)DVFAAEVETLGtIR(H)	T743	0.95	2.1436	0.6307	2	Phospho (+80)	534.257	1599.75	3	-0.005839	-3.648	3112	HAE-T851A_TiO2-exposed.09977.09977.3.dta	trypsin
(R)DVFAAEVEtLGTIR(H)	T740	0.95	2.5462	0.8334	2	Phospho (+80)	800.883	1599.75	2	-0.003995	-2.496	14190	HAE-T851A_TiO2-exposed.05059.05059.2.dta	trypsin
(R)DVFAAEVETLGtIR(H)	T743	0.95	3.3054	0.8427	2	Phospho (+80)	800.882	1599.75	2	-0.004971	-3.106	7899	HAE-T851A_TiO2-exposed.06200.06200.2.dta	trypsin
(R)DVFAAEVETLGtIR(H)	T743	0.95	1.6498	0.7667	2	Phospho (+80)	534.257	1599.75	3	-0.006022	-3.762	2727	HAE-T851A_TiO2-exposed.10252.10252.3.dta	trypsin
(R)DVFAAEVETLGtIR(H)	T743	0.95	1.7948	0.7705	2	Phospho (+80)	534.256	1599.75	3	-0.009501	-5.936	4050	HAE-T851A_TiO2-exposed.11042.11042.3.dta	trypsin
(R)DVFAAEVEtLGTIR(H)	T740	0.95	2.2054	0.7361	2	Phospho (+80)	800.882	1599.75	2	-0.00546	-3.411	7202	HAE-T851A_TiO2-purified.05830.05830.2.dta	trypsin
(K)APEAMsGIAGScGYIAPEYVYTLR(V)	S856	0.95	4.3013	0.6943	2	Phospho (+80), Carbamidomethyl (+57)	1328.59	2655.16	2	-0.0115	-4.328	34099	HAE-T851A_TiO2-exposed.06059.06059.2.dta	trypsin
(K)APEAMsGIAGScGYIAPEYVYTLR(V)	S856	0.95	3.866	0.6522	2	Phospho (+80), Carbamidomethyl (+57)	886.065	2655.17	3	-0.001073	-0.4039	206011	HAE-T851A_TiO2-exposed.06087.06087.3.dta	trypsin
(K)APEAMsGIAGScGYIAPEYVYTLR(V)	S856	0.95	4.4179	0.7025	2	Phospho (+80), Carbamidomethyl (+57)	886.065	2655.17	3	-0.002355	-0.8865	4022	HAE-T851A_TiO2-purified.07027.07027.3.dta	trypsin
(K)APEAmsGIAGScGYIAPEYVYTLR(V)	S856	0.95	4.7889	0.8104	2	Oxidation (+16), Phospho (+80), Carbamidomethyl (+57)	1336.59	2671.16	2	-0.007632	-2.856	197986	HAE-T851A_TiO2-exposed.05294.05294.2.dta	trypsin
(K)APEAmsGIAGScGYIAPEYVYTLR(V)	S856	0.95	4.306	0.7383	2	Oxidation (+16), Phospho (+80), Carbamidomethyl (+57)	891.398	2671.17	3	0.003035	1.136	29793	HAE-T851A_TiO2-exposed.05301.05301.3.dta	trypsin
(K)APEAmsGIAGScGYIAPEYVYTLR(V)	S856	0.95	3.9605	0.5937	2	Oxidation (+16), Phospho (+80), Carbamidomethyl (+57)	891.399	2671.17	3	0.003768	1.41	7567	HAE-T851A_TiO2-purified.06582.06582.3.dta	trypsin
(K)APEAmsGIAGScGYIAPEYVYTLR(V)	S856	0.95	4.5518	0.7959	2	Oxidation (+16), Phospho (+80), Carbamidomethyl (+57)	1336.59	2671.17	2	0.00311	1.164	15344	HAE-T851A_TiO2-purified.06273.06273.2.dta	trypsin
(K)APEAmsGIAGScGYIAPEYVYTLR(V)	S856	0.95	4.7129	0.7457	2	Oxidation (+16), Phospho (+80), Carbamidomethyl (+57)	891.399	2671.17	3	0.003585	1.342	22607	HAE-T851A_TiO2-purified.06259.06259.3.dta	trypsin
MBP-HAE-T851A (replicate 2)
(R)ALKSStLAASKWR(S)	T660	0.95	2.7897	0.9217	2	Phospho (+80)	500.265	1497.77	3	0.002714	1.81	333212	HAE-trypsin.02258.02258.3.dta	trypsin
(K)SStLAASK(W)	T660	0.95	1.6662	0.6805	2	Phospho (+80)	422.696	843.377	2	0.003148	3.728	16857	HAE-trypsin.01576.01576.2.dta	trypsin
(K)SSTLAAsKWR(S)	S664	0.95	1.555	0.5231	2	Phospho (+80)	593.784	1185.55	2	-0.0006165	-0.5196	149389	HAE-trypsin.02438.02438.2.dta	trypsin
(K)NVIGFGSsGK(V)	S694	0.95	2.1387	0.8221	2	Phospho (+80)	523.239	1044.46	2	-0.001336	-1.278	314699	HAE-trypsin.03060.03060.2.dta	trypsin
(K)LNKsVKGGDDEYSSDSLNR(D)	S716	0.95	3.8319	0.7538	2	Phospho (+80)	721.99	2162.95	3	0.001489	0.6879	258404	HAE-trypsin.01926.01926.3.dta	trypsin
(K)SVKGGDDEYssDSLNRDVFAAEVETLGTIR(H)	S725/S726	0.95	5.6696	0.0348	2	Phospho (+80), Phospho (+80)	1130.84	3389.48	3	0.01299	3.83	234125	HAE-trypsin.08078.08078.3.dta	trypsin
(K)SVKGGDDEYssDSLNRDVFAAEVETLGTIR(H)	S725/S726	0.95	6.1027	0.0226	2	Phospho (+80), Phospho (+80)	1130.84	3389.49	3	0.01555	4.587	130336	HAE-trypsin.07699.07699.3.dta	trypsin
(K)SVKGGDDEySSDSLNR(D)	Y724	0.95	3.9532	0.0914	2	Phospho (+80)	904.873	1807.73	2	0.005118	2.829	50145	HAE-trypsin.01762.01762.2.dta	trypsin
(K)SVKGGDDEySSDSLNR(D)	Y724	0.95	3.0899	0.2664	2	Phospho (+80)	603.583	1807.73	3	0.001443	0.7975	41731	HAE-trypsin.01766.01766.3.dta	trypsin
(K)GGDDEySsDSLNR(D)	Y724/S726	0.95	3.2505	0.0703	2	Phospho (+80), Phospho (+80)	787.757	1573.5	2	0.002253	1.431	4229	HAE-trypsin.01588.01588.2.dta	trypsin
(K)GGDDEySSDSLNR(D)	Y724	0.95	3.9568	0.7292	2	Phospho (+80)	747.773	1493.53	2	0.001177	0.7872	238316	HAE-trypsin.01835.01835.2.dta	trypsin
(K)GGDDEYSSDSLNRDVFAAEVETLGtIR(H)	T743	0.95	3.4624	0.632	2	Phospho (+80)	999.447	2995.32	3	0.01017	3.393	136002	HAE-trypsin.06346.06346.3.dta	trypsin
(K)GGDDEYsSDSLNRDVFAAEVETLGTIR(H)	S725	0.95	4.7509	0.7437	2	Phospho (+80)	999.446	2995.32	3	0.008703	2.904	1084830	HAE-trypsin.08668.08668.3.dta	trypsin
(R)DVFAAEVETLGtIR(H)	T743	0.95	1.7027	0.5587	2	Phospho (+80)	534.258	1599.75	3	-0.001261	-0.7881	6771	HAE-trypsin.09923.09923.3.dta	trypsin
(R)DVFAAEVETLGtIR(H)	T743	0.95	1.614	0.5799	2	Phospho (+80)	534.258	1599.75	3	-0.001444	-0.9024	2970	HAE-trypsin.08489.08489.3.dta	trypsin
(R)DVFAAEVETLGtIR(H)	T743	0.95	2.0612	0.7474	2	Phospho (+80)	800.885	1599.76	2	0.001254	0.7831	65239	HAE-trypsin.08052.08052.2.dta	trypsin
(R)DVFAAEVETLGtIR(H)	T743	0.95	1.9874	0.7602	2	Phospho (+80)	800.886	1599.76	2	0.002963	1.851	2385	HAE-trypsin.09036.09036.2.dta	trypsin
(R)DVFAAEVETLGtIR(H)	T743	0.95	2.3878	0.7479	2	Phospho (+80)	800.886	1599.76	2	0.002841	1.774	2619	HAE-trypsin.10534.10534.2.dta	trypsin
(R)DVFAAEVETLGtIR(H)	T743	0.95	2.301	0.5592	2	Phospho (+80)	534.258	1599.75	3	-0.001444	-0.9024	7277	HAE-trypsin.06900.06900.3.dta	trypsin
(R)DVFAAEVETLGtIR(H)	T743	0.95	2.577	0.7604	2	Phospho (+80)	800.886	1599.76	2	0.002719	1.698	89942	HAE-trypsin.07103.07103.2.dta	trypsin
(R)DVFAAEVETLGtIR(H)	T743	0.95	2.721	0.7604	2	Phospho (+80)	800.886	1599.76	2	0.002719	1.698	24188	HAE-trypsin.06512.06512.2.dta	trypsin
(R)DVFAAEVEtLGTIR(H)	T740	0.95	2.4932	0.7995	2	Phospho (+80)	800.885	1599.76	2	0.001254	0.7831	12092	HAE-trypsin.05516.05516.2.dta	trypsin
(R)DVFAAEVETLGtIR(H)	T743	0.95	2.7631	0.7851	2	Phospho (+80)	800.885	1599.76	2	0.001376	0.8593	19545	HAE-trypsin.09686.09686.2.dta	trypsin
(R)DVFAAEVETLGtIR(H)	T743	0.95	2.5418	0.8157	2	Phospho (+80)	800.886	1599.76	2	0.002597	1.622	96731	HAE-trypsin.06811.06811.2.dta	trypsin
(R)DVFAAEVETLGtIR(H)	T743	0.95	3.0325	0.7623	2	Phospho (+80)	800.887	1599.76	2	0.004062	2.537	15908	HAE-trypsin.10261.10261.2.dta	trypsin
(R)DVFAAEVETLGtIR(H)	T743	0.95	2.5445	0.8323	2	Phospho (+80)	800.886	1599.76	2	0.001865	1.165	25618	HAE-trypsin.08690.08690.2.dta	trypsin
(R)DVFAAEVETLGtIR(H)	T743	0.95	3.2055	0.7541	2	Phospho (+80)	800.886	1599.76	2	0.001987	1.241	252311	HAE-trypsin.07725.07725.2.dta	trypsin
(R)DVFAAEVETLGtIR(H)	T743	0.95	3.2117	0.7603	2	Phospho (+80)	800.885	1599.76	2	0.001743	1.089	64299	HAE-trypsin.07411.07411.2.dta	trypsin
(R)DVFAAEVETLGtIR(H)	T743	0.95	3.1446	0.8168	2	Phospho (+80)	800.886	1599.76	2	0.003696	2.309	17050	HAE-trypsin.09377.09377.2.dta	trypsin
(R)DVFAAEVETLGtIR(H)	T743	0.95	3.2207	0.809	2	Phospho (+80)	800.886	1599.76	2	0.002231	1.393	8652	HAE-trypsin.09969.09969.2.dta	trypsin
(R)DVFAAEVETLGtIR(H)	T743	0.95	1.9326	0.717	2	Phospho (+80)	534.259	1599.75	3	-0.0007125	-0.4451	2381	HAE-trypsin.06617.06617.3.dta	trypsin
(R)DVFAAEVETLGtIR(H)	T743	0.95	2.5496	0.7144	2	Phospho (+80)	534.259	1599.75	3	-0.0008955	-0.5594	9258	HAE-trypsin.07200.07200.3.dta	trypsin
(R)IALDAAEGLsYLHHDcVPPIVHR(D)	S805	0.95	3.1281	0.7347	2	Phospho (+80), Carbamidomethyl (+57)	888.435	2662.28	3	0.01148	4.31	28654	HAE-trypsin.04491.04491.3.dta	trypsin
(K)SsNILLDSDYGAK(V)	S823	0.95	1.8191	0.731	2	Phospho (+80)	731.826	1461.64	2	-0.001088	-0.7442	3816	HAE-trypsin.03666.03666.2.dta	trypsin
(K)APEAMsGIAGscGYIAPEYVYTLR(V)	S856/S861	0.95	3.0263	0.1188	2	Phospho (+80), Phospho (+80), Carbamidomethyl (+57)	1368.58	2735.14	2	-4.527e-05	-0.01654	24308	HAE-trypsin.07262.07262.2.dta	trypsin
(K)APEAMSGIAGscGYIAPEYVYTLR(V)	S861	0.95	4.1848	0.1263	2	Phospho (+80), Carbamidomethyl (+57)	1328.59	2655.17	2	-0.001487	-0.5597	252788	HAE-trypsin.06464.06464.2.dta	trypsin
(K)APEAMsGIAGScGYIAPEYVYTLR(V)	S856	0.95	3.1738	0.5202	2	Phospho (+80), Carbamidomethyl (+57)	664.801	2655.18	4	-0.0001708	-0.0643	5460	HAE-trypsin.06710.06710.4.dta	trypsin
(K)APEAMsGIAGScGYIAPEYVYTLR(V)	S856	0.95	3.5516	0.6783	2	Phospho (+80), Carbamidomethyl (+57)	1328.59	2655.17	2	-0.0005098	-0.1919	14462	HAE-trypsin.09856.09856.2.dta	trypsin
(K)APEAMsGIAGScGYIAPEYVYTLR(V)	S856	0.95	3.9626	0.6524	2	Phospho (+80), Carbamidomethyl (+57)	1328.59	2655.18	2	-2.178e-05	-0.008201	26446	HAE-trypsin.07114.07114.2.dta	trypsin
(K)APEAMsGIAGScGYIAPEYVYTLR(V)	S856	0.95	4.1555	0.6775	2	Phospho (+80), Carbamidomethyl (+57)	1328.61	2655.2	2	0.02366	8.908	16960	HAE-trypsin.07731.07731.2.dta	trypsin
(K)APEAMsGIAGScGYIAPEYVYTLR(V)	S856	0.95	4.2564	0.6864	2	Phospho (+80), Carbamidomethyl (+57)	1328.6	2655.18	2	0.004372	1.646	2063330	HAE-trypsin.06775.06775.2.dta	trypsin
(K)APEAMsGIAGScGYIAPEYVYTLR(V)	S856	0.95	4.4382	0.6853	2	Phospho (+80), Carbamidomethyl (+57)	1328.59	2655.17	2	-0.006614	-2.49	27123	HAE-trypsin.07671.07671.2.dta	trypsin
(K)APEAMsGIAGScGYIAPEYVYTLR(V)	S856	0.95	4.1088	0.7455	2	Phospho (+80), Carbamidomethyl (+57)	1328.59	2655.17	2	-0.005393	-2.03	15666	HAE-trypsin.10157.10157.2.dta	trypsin
(K)APEAMsGIAGScGYIAPEYVYTLR(V)	S856	0.95	4.8753	0.6772	2	Phospho (+80), Carbamidomethyl (+57)	886.069	2655.19	3	0.01101	4.146	606112	HAE-trypsin.06849.06849.3.dta	trypsin
(K)APEAmsGIAGScGYIAPEYVYTLR(V)	S856	0.95	4.7824	0.8057	2	Oxidation (+16), Phospho (+80), Carbamidomethyl (+57)	1336.59	2671.17	2	-0.00275	-1.029	356487	HAE-trypsin.05801.05801.2.dta	trypsin
(K)APEAMSGIAGScGYIAPEYVYtLR(V)	T872	0.95	4.9183	0.017	2	Carbamidomethyl (+57), Phospho (+80)	1328.59	2655.17	2	-0.001243	-0.4679	878394	HAE-trypsin.05912.05912.2.dta	trypsin
(R)KVVIMLQEVSGAVPcSSPNtSKR(S)	T978	0.95	4.4248	0.0097	2	Carbamidomethyl (+57), Phospho (+80)	1284.14	2566.27	2	0.00466	1.815	1264950	HAE-trypsin.03375.03375.2.dta	trypsin
(R)KVVIMLQEVSGAVPcSSPNtSKR(S)	T978	0.95	4.6313	0.6232	2	Carbamidomethyl (+57), Phospho (+80)	856.431	2566.27	3	0.006478	2.523	7499080	HAE-trypsin.03360.03360.3.dta	trypsin
(K)VVIMLQEVSGAVPcSSPNtSKR(S)	T978	0.95	4.0447	0.0311	2	Carbamidomethyl (+57), Phospho (+80)	1220.09	2438.17	2	0.00469	1.923	33055	HAE-trypsin.04132.04132.2.dta	trypsin
(E)AMsGIAGScGYIAPE(Y)	S856	0.98	1.2695	0.4293	2	Phospho (+80), Carbamidomethyl (+57)	782.316	1562.62	2	0.002516	1.609	1417	HAE-GluC.10061.10061.2.dta	Glu-C
(E)AMsGIAGScGYIAPE(Y)	S856	1	1.608	0.5101	2	Phospho (+80), Carbamidomethyl (+57)	782.319	1562.62	2	0.008132	5.201	4226	HAE-GluC.05671.05671.2.dta	Glu-C
(E)AMsGIAGScGYIAPE(Y)	S856	1	1.5907	0.521	2	Phospho (+80), Carbamidomethyl (+57)	782.316	1562.62	2	0.002639	1.688	10190	HAE-GluC.05036.05036.2.dta	Glu-C
(E)AMsGIAGScGYIAPE(Y)	S856	1	1.5459	0.611	2	Phospho (+80), Carbamidomethyl (+57)	782.316	1562.62	2	0.003493	2.234	4866	HAE-GluC.04671.04671.2.dta	Glu-C
(E)AMsGIAGScGYIAPE(Y)	S856	1	2.0746	0.69	2	Phospho (+80), Carbamidomethyl (+57)	782.315	1562.62	2	0.0003192	0.2042	8833	HAE-GluC.04297.04297.2.dta	Glu-C
(D)FGIAKVGQMSGSKAPEAMsGIAGScGYIAPE(Y)	S856	1	3.7091	0.1474	2	Phospho (+80), Carbamidomethyl (+57)	1576.22	3150.43	2	0.01009	3.202	61049	HAE-GluC.04848.04848.2.dta	Glu-C
(D)FGIAKVGQMsGSKAPE(A)	S847	1	3.2081	0.6291	2	Phospho (+80)	843.901	1685.79	2	0.001716	1.017	215165	HAE-GluC.02895.02895.2.dta	Glu-C
(E)LVTGKQPtDSE(L)	T898	1	1.9668	0.475	2	Phospho (+80)	627.785	1253.56	2	0.001459	1.163	42783	HAE-GluC.01868.01868.2.dta	Glu-C
(E)VVAVKKLNKsVKGGDDE(Y)	S716	1	2.7802	0.7353	2	Phospho (+80)	933.493	1864.97	2	0.005575	2.987	64247	HAE-GluC.01734.01734.2.dta	Glu-C
(E)VVAVKKLNKsVKGGDDE(Y)	S716	1	2.2289	0.6821	2	Phospho (+80)	622.663	1864.97	3	0.001228	0.6578	234422	HAE-GluC.01716.01716.3.dta	Glu-C
(E)YVYtLRVNE(K)	T872	1	1.2964	0.7245	2	Phospho (+80)	618.791	1235.57	2	0.0089	7.197	6697	HAE-GluC.04884.04884.2.dta	Glu-C
(E)YVYtLRVNE(K)	T872	1	1.7963	0.7731	2	Phospho (+80)	618.786	1235.56	2	-0.001354	-1.095	2936	HAE-GluC.03872.03872.2.dta	Glu-C
