# Supplementary material for: Analysis of Phosphorylation of the Receptor-Like Protein Kinase HAESA during Arabidopsis Floral Abscission
Source: PLoS One. 2016 Jan 19;11(1):e0147203. doi: 10.1371/journal.pone.0147203 (PMC4718614; doi:10.1371/journal.pone.0147203)
Supplement: S2 Table — (XLSX) [file pone.0147203.s013.xlsx]

## Sheet: Sheet1
Primer	Lab name	Sequence	Note
hae-3 dCAPS F	IT705	GTCGAGCTTCGGAGAGTTTC	hae-3 dCAPs, F PstI (cuts other primer)
hae-3 dCAPS R	IT706	GAG GTA TCG GAC CGA CGA GGC TG	hae-3 dCAPs, R PstI (cuts this primer)
hsl2-3 dCAPS F	IT242	gaaaagatcgctgctctgcaac	dCAPS hsl2-3 L, cuts WT w/XhoI, ~200 in WT and ~225 in Mut
hsl2-3 dCAPS R	IT243	catcgaattcagagatttctgagaatttct	dCAPS hsl2-3 R, cuts WT w/XhoI, ~200 in WT and ~225 in Mut
gHAE F- NotI	SB3	CGG TGT GCG GCC GC A TCT TCA ATT GTT TTT TCG TTA ATC	for cloning into pE6c
gHAE R- NotI,	SB4	GAG TAT GCG GCC GCA ACG CTG TTC AAG TCT TCC GTG TAG	for cloning into pE6c
HAE sequencing 1 F	IT49	ccc atg tct tgt cac agt gct cgt	HAE frag 1 F
HAE sequencing 1 R	IT50	tgc tcg acg gtt ttt agc tgc gt	HAE frag 1 R
HAE sequencing 1 F	IT51	agc tgc gac gcc acg tca aa	HAE frag 2 F
HAE sequencing 1 R	IT52	acg gtg agt tag cgc cga gt	HAE frag 2 R
HAE sequencing 1 F	IT53	acg cag cta aaa acc gtc gag ca	HAE frag 3 F
HAE sequencing 1 R	IT54	CCC CAA CGT TTC AAC CTC CGC TG	HAE frag 3 R
HAE sequencing 1 F	IT55	tcc ggt gag att ccg ttg gag tt	HAE frag 4 F
HAE sequencing 1 R	IT56	tcc ccg gcc caa acc gat tc	HAE frag 4 R
YFP sequencing F- downatream of activation loop	IT224	TGC TTT GGA CGC TGC CGA
YFP sequencing R- in YFP	IT225	GTA GGT GGC ATC GCC CTC
gHAE, F- KpnI	SKC149	tctggtaccATGCTTTATTGTCTTATTCTCCTCCTATG	for cloning into pENTR for 35S::HAE-GFP
gHAE, R- KpnI	SKC150	tctggtaccTCAAACGCTGTTCAAGTCTTCCG	for cloning into pENTR for 35S::HAE-GFP
pMAL F, sequencing	IT402	GGTCGTCAGACTGTCGATGAAGCC
pMAL R, sequencing	IT593	GTGCTGCAAGGCGATTAAGT
T740A F, Quickchange mutagenesis	KS29	agg ttg aag cgt tgg gga cga	for recombinant
T740A R, Quickchange mutagenesis	KS30	tcg tcc cca acg ctt caa cct	for recombinant
T743A F, Quickchange mutagenesis	KS31	aaa cgt tgg ggg cga tta ggc	for recombinant
T743A R, Quickchange mutagenesis	KS32	gcc taa tcg ccc cca acg ttt	for recombinant
S829A F, Quickchange mutagenesis	KS11	gag taa cat act gct aga tgc gga tta tgg ggc taa agt tg	for recombinant
S829A R, Quickchange mutagenesis	KS12	caa ctt tag ccc cat aat ccg cat cta gca gta tgt tac tc	for recombinant
T872A F, Quickchange mutagenesis	KS33	gaa tac gta tac gcg ctt cgg gtg aat	for recombinant
T872A R, Quickchange mutagenesis	KS34	att cac ccg aag cgc gta tac gta ttc	for recombinant
T978A F, Quickchange mutagenesis	KS35	gca gtc caa agg cgt cta aac gat cta	for recombinant
T978A R, Quickchange mutagenesis	KS36	tag atc gtt tag acg cct ttg gac tgc	for recombinant
S979A F, Quickchange mutagenesis	KS27	cag tcc aaa cac agc gaa acg atc taa aac	for recombinant
S979A R, Quickchange mutagenesis	KS28	gtt tta gat cgt ttc gct gtg ttt gga ctg	for recombinant
S998A F, Quickchange mutagenesis	KS25	cgg aag act tga acg cgg ttt gaa g	for recombinant
S998A R, Quickchange mutagenesis	KS26	ctt caa acc gcg ttc aag tct tcc g	for recombinant
T740D F, iPCR mutagenesis	IT412	gatTTGGGGACGATTAGGCACAAGAG	for in vivo
S856D F, iPCR mutagenesis	IT374	atcCATAGCTTCTGGAGTTTTGGAAC	for in vivo
S856D R, iPCR mutagenesis	IT374	atcCATAGCTTCTGGAGTTTTGGAAC	for in vivo
T872D F, iPCR mutagenesis	IT411	gatCTTCGGGTGAATGAAAAGAG	for recombinant
T740A F, iPCR mutagenesis	IT311	gctTTGGGGACGATTAGGCACAAGAG	for in vivo
T740A R, iPCR mutagenesis	IT312	TTCAACCTCCGCTGCAAAAACATC	for in vivo
T743A F, iPCR mutagenesis	IT313	gctATTAGGCACAAGAGTATTGTGCGTTTG	for in vivo
T743A R, iPCR mutagenesis	IT314	CCC CAA CGT TTC AAC CTC CGC TG	for in vivo
S829A F, iPCR mutagenesis	IT315	gctGATTATGGGGCTAAAGTTGCTG	for in vivo
S829A R, iPCR mutagenesis	IT316	ATCTAGCAGTATGTTACTCGACTTCAC	for in vivo
T851A F, iPCR mutagenesis	IT405	gctCCAGAAGCTATGTCCGGGATC	for in vivo/recombinant
T851A R, iPCR mutagenesis	IT407	TTTGGAACCACTCATCTGACCGACTTTAG	for in vivo/recombinant
S856A F, iPCR mutagenesis	IT581	GGGATCGCCGGTTCTTGTGGTTACATTGC	S861 WT F ipcr, use with IT371 for S856A single
S856A R, iPCR mutagenesis	IT371	AgcCATAGCTTCTGGAGTTTTGGAAC	for in vivo/recombinant
T872A F, iPCR mutagenesis	IT317	gctCTTCGGGTGAATGAAAAGAG	for in vivo
T872A R, iPCR mutagenesis, CDS for recombinant	IT513	GTATACGTATTCTGGTGCAATG	T872 R ipcr- without intronic sequence, for recombinant
T872A R, iPCR mutagenesis, genomic for in vivo	IT318	GTATACGTATTctgcaaaattgaaaac	for in vivo
T978A F, iPCR mutagenesis	IT322	gct TCT AAA CGA TCT AAA ACC GGT GGG A	for in vivo
T978A R, iPCR mutagenesis	IT323	GTT TGG ACT GCT ACA AGG AAC AGC ACC	for in vivo
S979A F, iPCR mutagenesis	IT306	GCTAAACGATCTAAAACCGGTGG	for in vivo
S979A R, iPCR mutagenesis	IT307	TGTGTTTGGACTGCTACAAGGAAC	for in vivo
S998A F, iPCR mutagenesis	IT324	CTACACGGAAGACTTGAACgctGTTgcgg	for in vivo
S998A R, iPCR mutagenesis	IT325	TAA GGC GAG AGT TTC CCA CC	for in vivo
S861A F, iPCR mutagenesis	IT370	GGGATCGCCGGTgCTTGTGGTTACATTGC	for in vivo
S861A R, iPCR mutagenesis (wildtype)	IT372	GGACATAGCTTCTGGAGTTTTGGAAC	S856 R ipcr- WT for making S861A single mutant
S861D F, iPCR mutagenesis	IT373	GGGATCGCCGGTgaTTGTGGTTACATTGC	for in vivo
S847A R, iPCR mutagenesis	IT508	agcCATCTGACCGACTTTAGCGATCC	HAE S847A R iPCR
S849A/T851A/S856A F, iPCR mutagenesis	IT509	GGTgctAAAgctCCAGAAGCTATGgctG	HAE S849A F iPCR, T851A and S856A, used on premade T851A/S856A double mutant
K711E F, iPCR	IT514	CACAGCTACAACTTCTCCACCTCTAAGCTC	K711E iPCR R WT
K711E R, iPCR	IT515	GAAAAACTTAACAAAAGTGTTAAAGG	K711E iPCR F mutant
hae-5 F, dCAPS	IT238	GAATCGATTTTCAGGTTCAATCCCCAACGAAATCGGATC	dCAPS hae-5 L, cuts WT with AccI, ~200 in WT, ~230 in Mut
hae-5 R, dCAPS	IT239	GGA GAG ATG ATT ATT AGC CAA ATT AAG CTC GTTTAGAGTCTA	dCAPS hae-5 R, cuts WT with AccI, ~200 in WT, ~230 in Mut
hsl2-4 F, dCAPS	IT244	CACTCTTTCTCAAAACAATCTCAATGGTACGATTGATTCTGCTC	dCAPS hsl2-4 L, cuts WT with XhoI, ~200 in WT, ~230 in Mut
hsl4-4 R, dCAPS	IT245	GAA CTT GCA GAG CAG TGA GTC TCC CGTAACCTC	dCAPS hsl2-4 R, cuts WT with XhoI, ~200 in WT, ~230 in Mut
Y724F F, iPCR mutagenesis	IT637	TCA GTA GTG ATT CGT TGA ATA GAG ATG TTT TTG	HAE Y724F F
Y724F R, iPCR mutagenesis	IT638	ATTCATCATCTCCTCCTTTAACACTTTTG	HAE Y724F R
Y724E F, iPCR mutagenesis	IT639	GAG AGT AGT GAT TCG TTG AAT AGA GAT GTT TTT G	HAE Y724E F
Y724E R, iPCR mutagenesis	IT640	TTCATCATCTCCTCCTTTAACACTTTTG	HAE Y724E R
S861E F iPCR	IT656	GGGATCGCCGGTgagTGTGGTTACATTGC	S861E F ipcr, use with 657
S856E R iPCR	IT657	ctcCATAGCTTCTGGAGTTTTGGAAC	S856E R ipcr, use with 656
HAE-YFP stop codon introduction R	IT506	TCA AAC GCT GTT CAA GTC TTC CGT G	HAE stop codon introduction R, iPCR, introduce stop in HAE
HAE-YFP stop codon introduction F	IT507	CGG CAT GGA CGA GCT GTA CAA GTA A	HAE stop codon introduction F, iPCR end of YFP
SpecR F	IT425	tattgaaaaa ggaagagt ATG CGC TCA CGC AAC TGG	F, SpecR from pCR8/GW/TOPO
SpecR R	IT426	taaacttggtctgacag TTA TTT GCC GAC TAC CTT GGT GAT CTC	R, SpecR from pCR8/GW/TOPO
AmpR deletion	IT427	ACT CTT CCT TTT TCA ATA TTA TTG AAG C	Reverse, upstream of AmpR in pMAL. For swapping resistance.
AmpR deletion	IT428	CTG TCA GAC CAA GTT TAC TCA TAT ATA C	Forward, downstream of AmpR in pMAL. For swapping resistance.
